# Supplementary material
Source: PubMed Central journal article supplement (PMC5391144)
Supplement: EMBJ-36-1046-s001.pdf [file EMBJ-36-1046-s001.pdf]

## **Appendix Information**

### **Mitochondrial chaperone HSP-60 regulates anti-bacterial immunity via p38**

#### **MAP kinase signaling**

Dae-Eun Jeong, Dongyeop Lee, Sun-Young Hwang, Yujin Lee, Jee-Eun Lee, Mihwa Seo, Wooseon Hwang, Keunhee Seo, Ara B. Hwang, Murat Artan, Heehwa G. Son, Jay-Hyun Jo, Haeshim Baek, Young Min Oh, Youngjae Ryu, Hyung-Jun Kim, Chang Man Ha, Joo-Yeon Yoo\*, and Seung-Jae V. Lee\*

\* Corresponding authors

E-mail: jyoo@postech.ac.kr (JYY), seungjaelee@postech.ac.kr (SJVL)

#### **Table of contents:**

Appendix Figures S1-S6

Appendix Tables S1-S11

Appendix References

# Appendix Figure S1

A

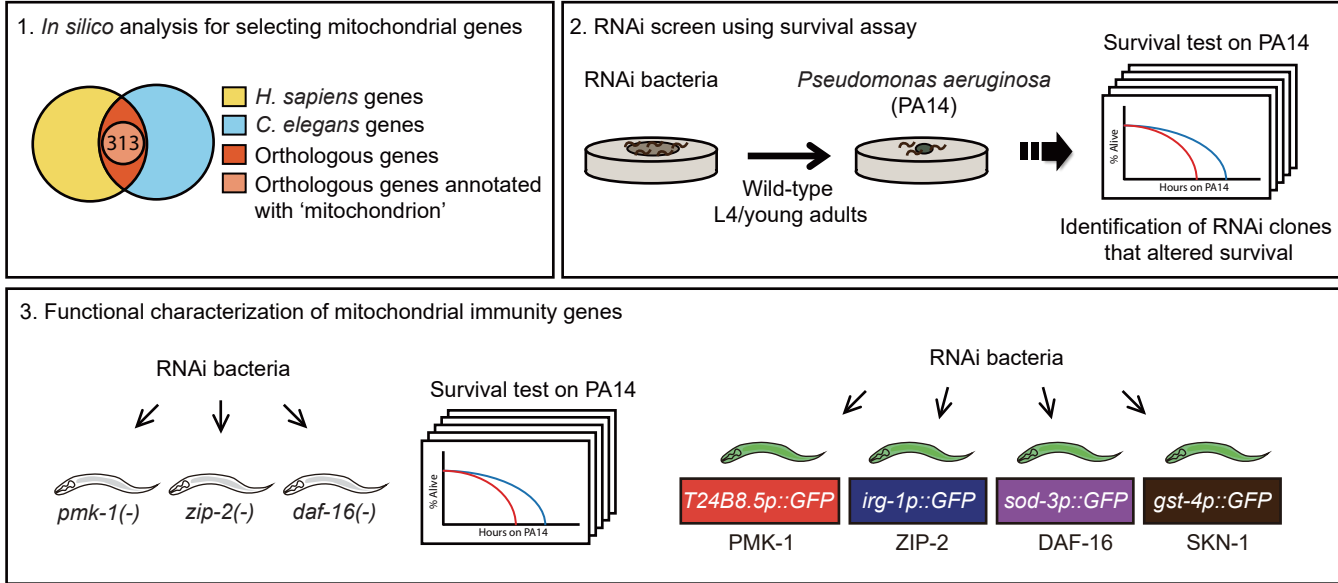

B

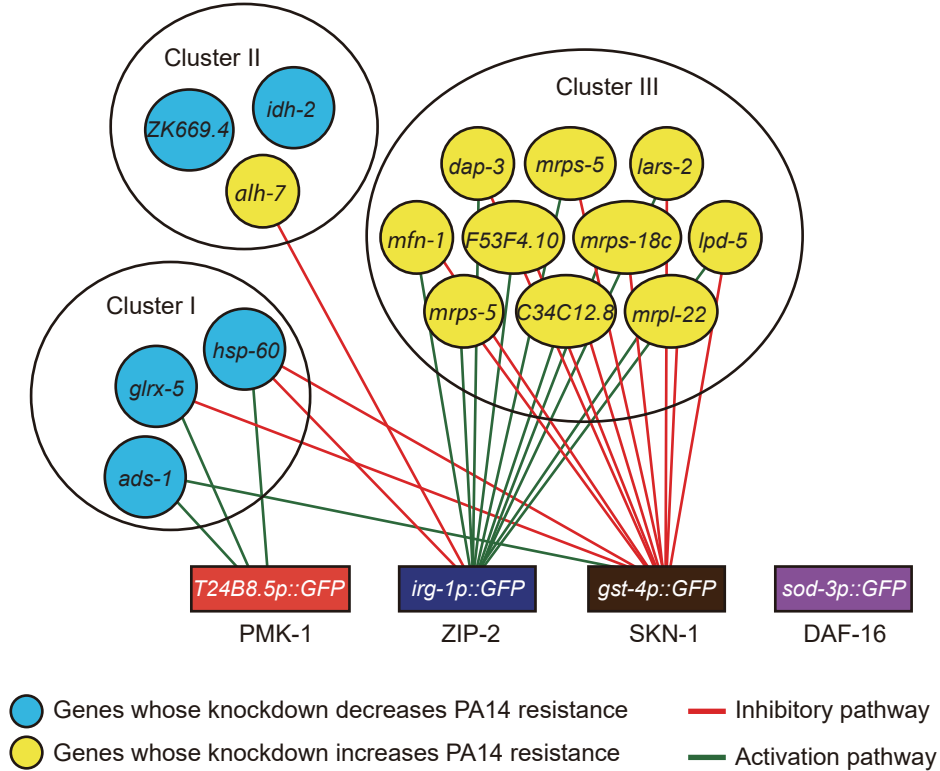

**Appendix Figure S1. RNAi screen for mitochondrial components that affect *C. elegans* immunity against PA14.**

- A** Schematic of overall primary and secondary RNAi screens. 1. Among 3,146 *C. elegans*-human orthologous genes, we filtered 313 mitochondrial genes whose human orthologs were annotated as Gene Ontology term “mitochondrion” (Ashburner et al, 2000; Gene Ontology, 2015) and included in human MitoCarta (Pagliarini et al, 2008) (See Materials and Methods for detail). 2. Standard PA14 slow killing assays were performed upon knocking down each of the 220 mitochondrial genes whose RNAi clones were available and did not cause severe developmental phenotypes. The survival time of *C. elegans* on PA14 was blindly measured and subsequently analyzed. 3. A secondary RNAi screen was carried out by performing a survival test on PA14 using immune-compromised mutants (*pmk-1(km25)*, *zip-2(tm4067)*, and *daf-16(mu86)*), and by measuring the levels of GFP reporters for known immune effectors (*T24B8.5p::GFP* for PMK-1, *irg-1p::GFP* for ZIP-2, *gst-4p::GFP* for SKN-1, and *sod-3p::GFP* for DAF-16).
- B** A schematic diagram that shows the effects of genes identified from our RNAi screen shown in panel A. Light blue circles and yellow circles indicate genes whose inhibition decreased and increased the survival of wild-type animals on PA14, respectively. Red and green lines indicate genes whose knockdown enhanced and suppressed the expression of the corresponding GFP reporters, respectively. The cluster I genes include a mitochondrial chaperone (*hsp-60*), glutaredoxin-related protein 5 (*glrx-5*), and alkyldihydroxyacetonephosphate synthase 1 (*ads-1*). Inhibition of the cluster I genes increased the susceptibility of wild-type animals to PA14 infection, and reduced the level

of *T24B8.5p::GFP* (Fig 1B-C and Dataset EV2). The PA14 resistance-decreasing effects of RNAi clones in this cluster were markedly reduced in *pmk-1* mutant animals (Fig 1B). These results suggest that genes in this cluster are required for resistance against PA14 via modulating PMK-1. The cluster II genes include mitochondrial isocitrate dehydrogenase 2 (*idh-2*), aldehyde dehydrogenase 7 (*alh-7*), and a dihydrolipoamide-branched chain transacylase (*ZK669.4*). RNAi clones targeting cluster II genes tend not to affect the expression of GFP reporters for known immune effector proteins that we tested (Fig 1C and Dataset EV2). Thus, genes in the cluster II may modulate unknown or other untested immune effectors to affect the PA14 susceptibility of *C. elegans*. The cluster III mostly consists of genes implicated in the mitochondrial mRNA translation and respiration. These include a tRNA synthetase (*lars-2*), mitochondrial ribosomal proteins (*mrps-35*, *mrpl-22*, *dap-3*, *mrps-18c*, and *mrps-5*), mitochondrial ETC components [an NADH-ubiquinone oxidoreductase flavoprotein 2 (F53F4.10/NDUFV2) and an NADH-coenzyme Q reductase (*lpd-5/NDUFS4*)], a mitochondrial iron transporter (*mfn-1*), and a component of presequence translocase-associated motor (PAM) complex (C34C12.8). Iron transporter and PAM complex are known to play roles in mitochondrial respiration in mammals (Chen et al, 2015; Kulawiak et al, 2013). RNAi clones targeting genes in this cluster increased the survival of animals on PA14 (Fig 1B and Dataset EV2). In addition, these RNAi clones generally increased the expression of the SKN-1 target *gst-4p::GFP*, while suppressing the induction of the ZIP-2 target *irg-1p::GFP* upon PA14 infection (Fig 1C and Dataset EV2). In contrast, the expression of PMK-1/p38 MAPK target reporter *T24B8.5p::GFP* was largely unaffected (Fig 1C and Dataset EV2). The effects of the RNAi clones on PA14 resistance decreased or

disappeared in *zip-2* or *daf-16* mutant animals (Fig 1B). Together, mitochondrial components that influence immunity against PA14 appear to form functional modules to regulate the activities of immune proteins.

Interestingly, five RNAi clones targeting mitochondrial ribosomal proteins increased PA14 resistance. Recent studies have shown that depletion of mitochondrial ribosomal proteins extends *C. elegans* lifespan through activating mitochondrial stress responses (Houthkooper et al, 2013). Although enhanced PA14 resistance is not always linked to longevity, many *C. elegans* longevity mutants are resistant to bacterial pathogens (Kim, 2013). Thus, it seems likely that RNAi targeting mitochondrial ribosomal protein genes promotes longevity, which may contribute to increased survival on PA14. Furthermore, depletion of mitochondrial ribosomal proteins activates UPR<sup>MT</sup>, which leads to the induction of anti-microbial genes (Nargund et al, 2012; Pellegrino et al, 2014) and mitochondrial chaperone genes, including *hsp-60*. The induction of *hsp-60* may then contribute to PA14 resistance, as we showed in this study.

Among the 16 RNAi clones, we noticed that RNAi clones targeting six genes (*dap-3*, *mrps-5*, *mrpl-22*, *mrps-35*, *mfn-1*, and *hsp-60*) were reported to induce UPR<sup>MT</sup> (Bennett et al, 2014). As five of these six RNAi clones were included in the cluster III and increased PA14 resistance, these five RNAi clones may activate UPR<sup>MT</sup> to enhance immunity in *C. elegans* (Pellegrino et al, 2014).

Knocking down each of four genes (*mrps-5*, *mrps-35*, *F53F4.10*, and *mfn-1*) in the cluster III suppresses the induction of *nlp-29*, an epidermal anti-microbial peptide, upon infection with a fungal pathogen (Couillault et al, 2004; Zugasti et al, 2016). RNAi

targeting each of five genes (*dap-3*, *mrpl-22*, *F53F4.10*, *mfn-1*, and *lpd-5*) in the cluster III also reduces the induction of an osmotic-response reporter *gpdh-1::GFP* caused by mutations in a mucin-like gene *osm-8* (Rohlfing et al, 2011). Transcriptional changes by osmotic stress and fungal infection are similar (Rohlfing et al, 2010), and resistance to osmotic stress correlates with immunity against fungal infection (Pujol et al, 2008). Therefore, inhibition of genes in the cluster III may promote the resistance against the pathogenic bacteria, PA14, while reducing protective responses to fungal pathogens and osmotic stresses.

# Appendix Figure S2

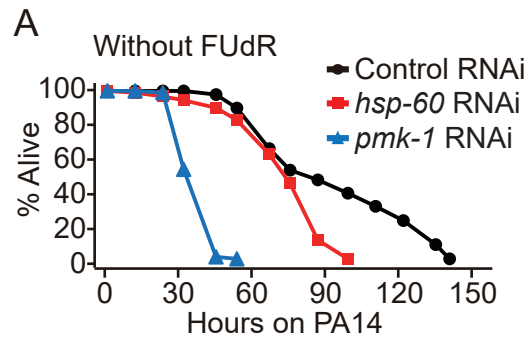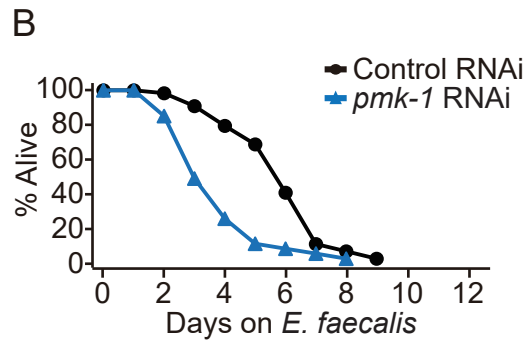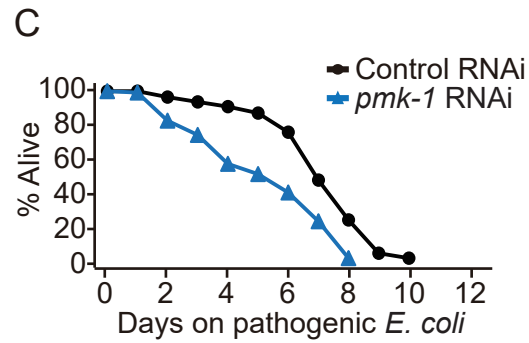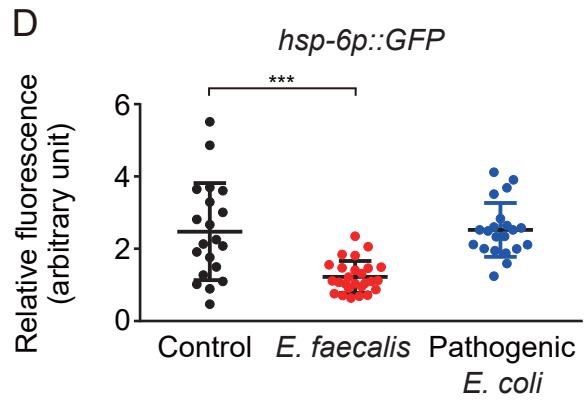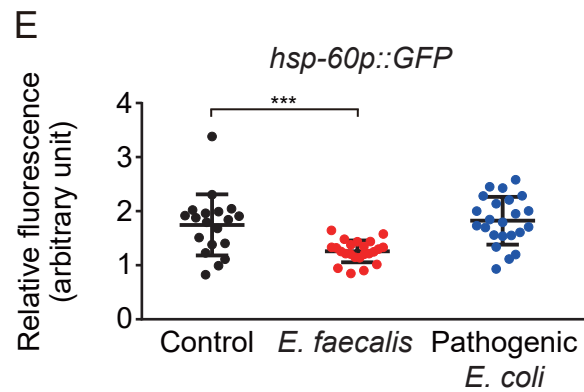

**Appendix Figure S2. The effects of *hsp-60* RNAi or *pmk-1* RNAi on PA14 resistance without FUdR treatment and resistance against pathogenic *E. faecalis* or pathogenic *E. coli*.**

**A** *hsp-60* RNAi reduced resistance to PA14 without fluoro-2'-deoxyuridine (FUdR) treatment.

**B-C** Knockdown of *pmk-1* reduced the survival of worms infected with *E. faecalis* (**B**) or pathogenic *E. coli* (**C**). *pmk-1* RNAi in this figure was used as a positive control for data in Fig 2H-I.

**D-E** Relative intensities for GFP expression were quantified using animals expressing *hsp-6p::GFP* (**D**) and *hsp-60p::GFP* (**E**) on control bacteria, *E. faecalis*, or pathogenic *E. coli*. Infection with *E. faecalis* or pathogenic *E. coli* did not increase the levels of *hsp-6p::GFP* or *hsp-60p::GFP*.

Data information: See Appendix Table S2 for additional repeats and statistical analysis for the survival and the lifespan data shown in this Figure. Error bars represent SEM. *p* values were calculated by using two-tailed Student's t-test (\*\*\*) $p < 0.001$ .



# Appendix Figure S3

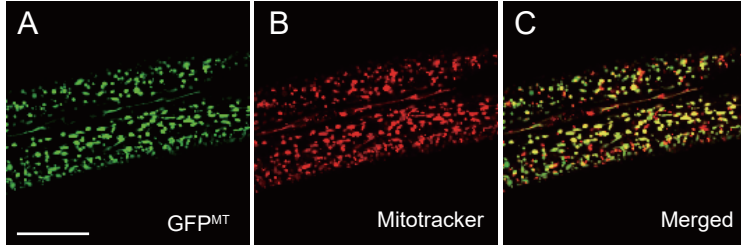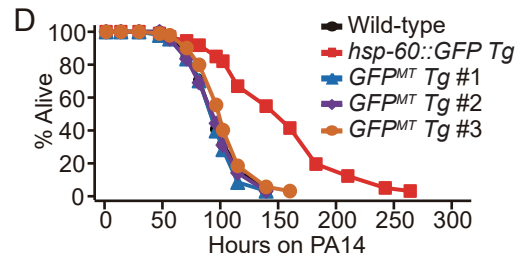

**Appendix Figure S3. Expression of GFP in mitochondria did not affect resistance against PA14.**

**A-C** Representative images of L2 larval animals that expressed GFP in the mitochondria ( $GFP^{MT}$ ) with N-terminal 60 amino acids (predicted mitochondrial targeting sequence) of HSP-60.  $GFP^{MT}$  (**A**) and mitochondria stained with the Mitotracker CMXRos (**B**) were co-localized (**C**). Scale bar indicates 25  $\mu$ m.

**D** Transgenic expression of only GFP in mitochondria ( $GFP^{MT} Tg$ ) did not affect the resistance of animals on PA14.

Data information: See Appendix Table S9 for additional repeats and statistical analysis for the survival and the lifespan data shown in this Figure.

# Appendix Figure S4

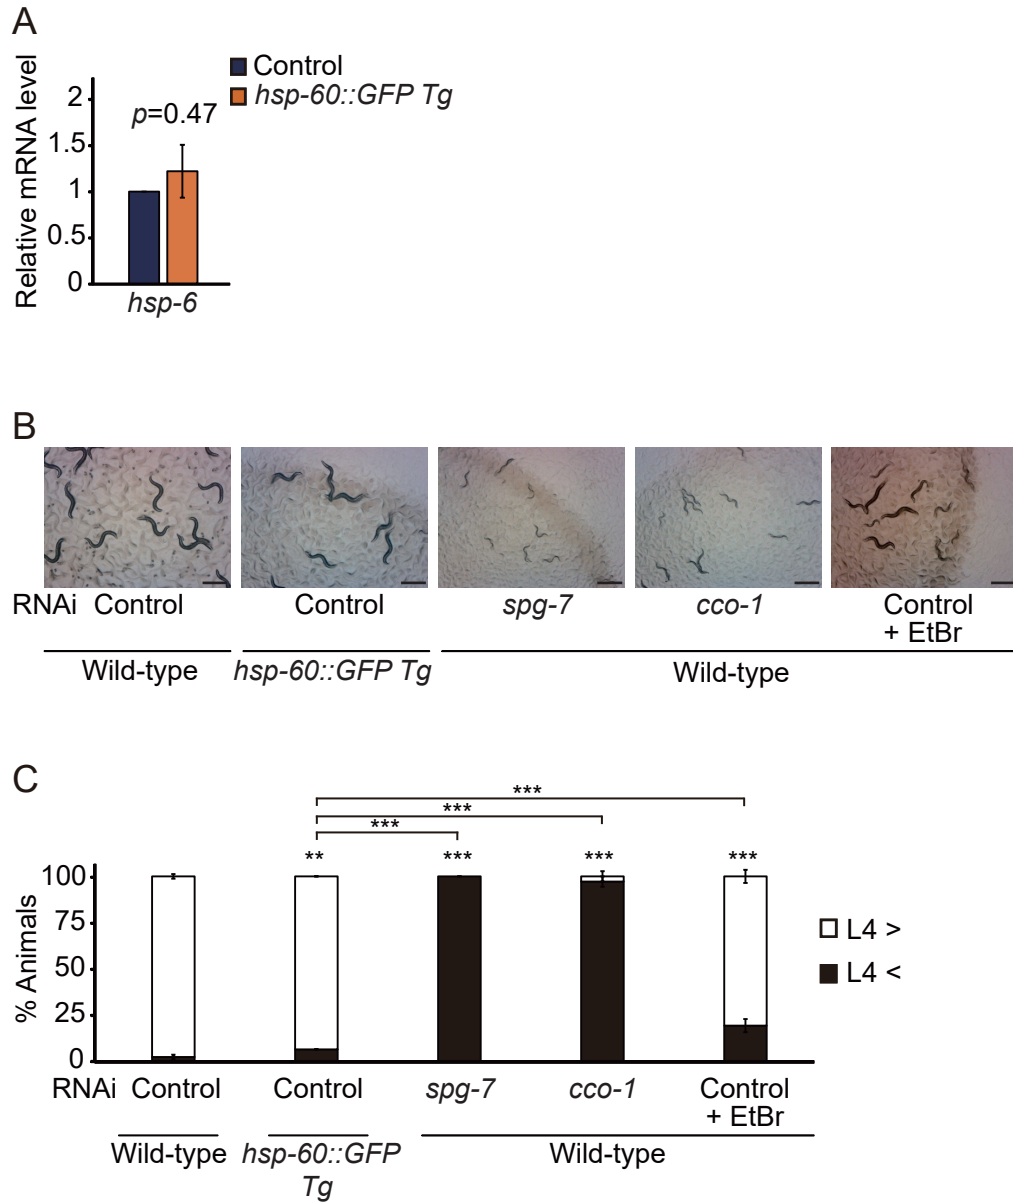

**Appendix Figure S4. *hsp-60::GFP* expression does not appear to induce mitochondrial stress.**

- A** *hsp-60::GFP Tg* did not affect the expression of *hsp-6*, another mitochondrial chaperone that was known to be induced by UPR<sup>MT</sup> (Yoneda et al, 2004).
- B** Representative pictures of wild-type and *hsp-60::GFP Tg* animals upon treating with control, *spg-7* or *cco-1* RNAi, or with EtBr (30 µg/ml). Scale bar indicates 500 µm.
- C** Quantification of data in panel **B** (n≥347 from at least two independent experiments). Error bars represent SEM (Chi-squared test, \*\* $p < 0.01$ , \*\*\* $p < 0.001$ ). *hsp-60* expression is known to be increased in response to stresses that trigger UPR<sup>MT</sup> (Pellegrino et al, 2013). Therefore, the activation of UPR<sup>MT</sup> upon PA14 infection might sequester a certain amount of HSP-60 away from the SEK-1/PMK-1 signaling pathway, and this might not allow the activation of a fully functional defense response. If so, one can expect that the induction of UPR<sup>MT</sup> is detrimental to animals upon PA14 infection. However, it does not seem to be the case as *spg-7* RNAi, which induces UPR<sup>MT</sup>, actually enhances resistance to PA14 (Pellegrino et al, 2014).

# Appendix Figure S5

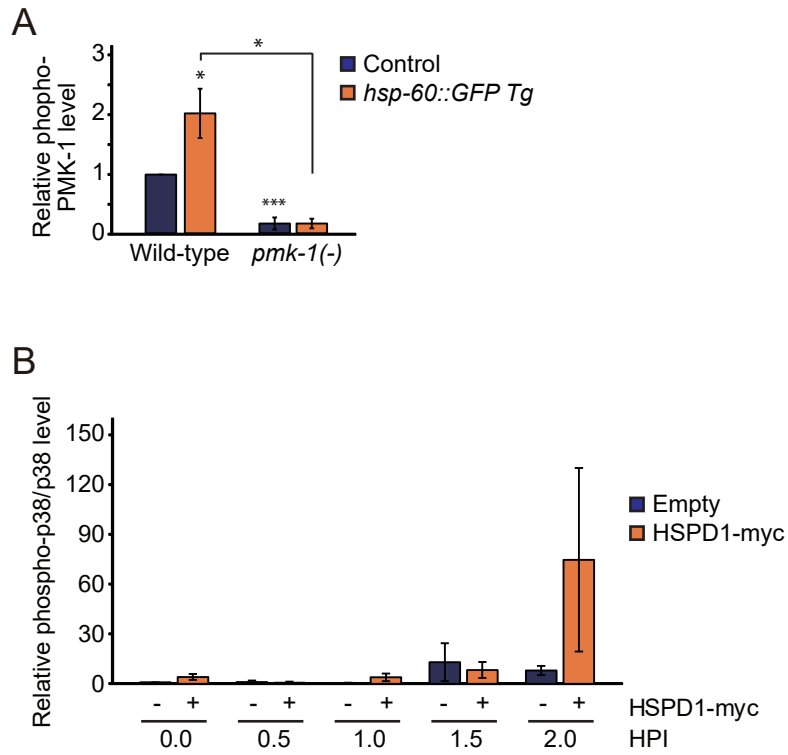

**Appendix Figure S5. Increased expression of *hsp-60/HSPD1* up-regulates the level of phospho-p38 MAPK in *C. elegans* and cultured human cells.**

**A** Quantification of data in Fig 7D (n=4).

**B** Quantification of data in Fig 7E (n≥3). HPI: hours post PA14 infection. See Fig 7E for a representative blot and the Source Data 1 that include all six Western blot data used for quantification.

Data information: Error bars represent SEM. *p* values were calculated by two tailed Student's *t* test (\*\**p*<0.01, \*\*\**p*<0.001).

# Appendix Figure S6

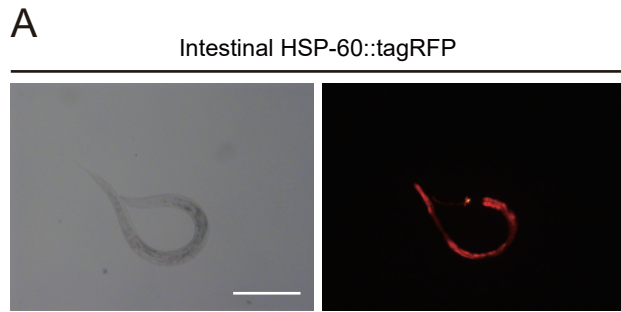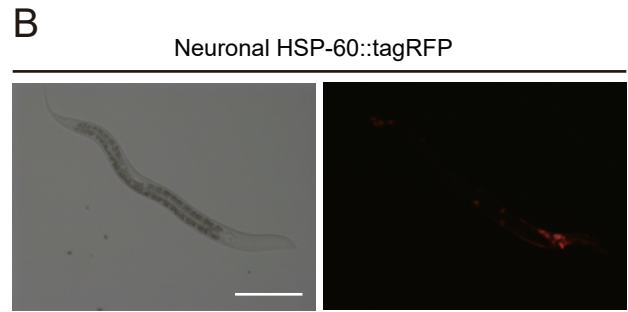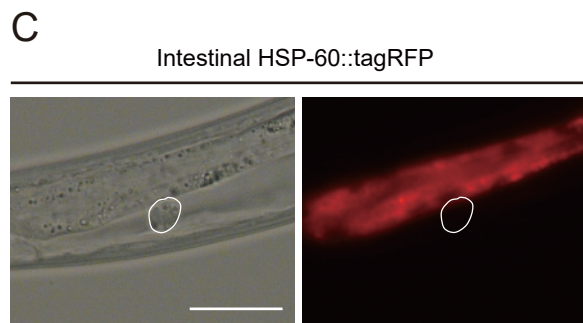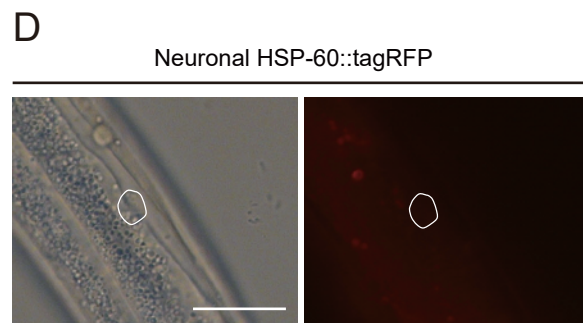

**Appendix Figure S6. HSP-60 expressed in the intestine or neurons is not localized in coelomocytes.**

**A-B** Representative bright field (left) and fluorescence (right) images of the transgenic animals that expressed HSP-60::tagRFP in the intestine by using a *vha-6* promoter (**A**) or in neurons by using an *unc-119* promoter (**B**). Scale bars indicate 200  $\mu\text{m}$ .

**C-D** Representative bright field (left) and fluorescence (right) images showing that HSP-60::GFP expressed in the intestine (**C**) or neurons (**D**) was not detected in coelomocytes marked with white circles. Scale bars indicate 25  $\mu\text{m}$ .



## Appendix Tables

**Appendix Table S1. The effects of RNAi clones targeting mitochondrial components on the survival of wild-type animals, and *pmk-1*, *zip-2* and *daf-16* mutants.**

| Strain /treatment                | Bacteria | Mean survival $\pm$ s.e.m. (hours) | Hours at 75% mortality | % change | Number of animals that died/total | <i>p</i> value vs. control | Figure in text |
|----------------------------------|----------|------------------------------------|------------------------|----------|-----------------------------------|----------------------------|----------------|
| Wild-type /Control RNAi          | PA14     | 93.7 $\pm$ 2.4                     | 101                    |          | 109/120                           |                            | Fig 1B         |
| Wild-type / <i>hsp-60</i> RNAi   | PA14     | 59.2 $\pm$ 0.9                     | 76                     | -37%     | 115/120                           | <0.001                     | Fig 1B         |
| Wild-type / <i>glrx-5</i> RNAi   | PA14     | 69.4 $\pm$ 1.3                     | 76                     | -26%     | 117/120                           | <0.001                     | Fig 1B         |
| Wild-type / <i>alh-7</i> RNAi    | PA14     | 109.4 $\pm$ 2.6                    | 129                    | 17%      | 108/120                           | <0.001                     | Fig 1B         |
| Wild-type /Control RNAi          | PA14     | 111.3 $\pm$ 2.24                   | 134                    |          | 113/120                           |                            | Fig 1B         |
| Wild-type / <i>ZK669.4</i> RNAi  | PA14     | 90.2 $\pm$ 1.8                     | 100                    | -19%     | 111/120                           | <0.001                     | Fig 1B         |
| Wild-type / <i>idh-2</i> RNAi    | PA14     | 97.3 $\pm$ 2.1                     | 114                    | -12%     | 106/120                           | <0.001                     | Fig 1B         |
| Wild-type /Control RNAi          | PA14     | 92.8 $\pm$ 2.1                     | 104                    |          | 108/120                           |                            | Fig 1B         |
| Wild-type / <i>ads-1</i> RNAi    | PA14     | 68.7 $\pm$ 1.5                     | 78                     | -26%     | 111/120                           | <0.001                     | Fig 1B         |
| Wild-type / <i>lars-2</i> RNAi   | PA14     | 118.7 $\pm$ 3.6                    | 137                    | 28%      | 80/90                             | <0.001                     | Fig 1B         |
| Wild-type / <i>mrpl-22</i> RNAi  | PA14     | 129.7 $\pm$ 3.5                    | 162                    | 40%      | 103/120                           | <0.001                     | Fig 1B         |
| Wild-type / <i>mrps-35</i> RNAi  | PA14     | 132.9 $\pm$ 3.2                    | 149                    | 43%      | 104/120                           | <0.001                     | Fig 1B         |
| Wild-type /Control RNAi          | PA14     | 108.0 $\pm$ 2.4                    | 121                    |          | 115/120                           |                            | Fig 1B         |
| Wild-type / <i>F53F4.10</i> RNAi | PA14     | 130.3 $\pm$ 3.9                    | 164                    | 21%      | 87/90                             | <0.001                     | Fig 1B         |
| Wild-type /Control RNAi          | PA14     | 108.5 $\pm$ 2.5                    | 127                    |          | 103/120                           |                            | Fig 1B         |
| Wild-type / <i>lpd-5</i> RNAi    | PA14     | 119.6 $\pm$ 3.3                    | 135                    | 10%      | 109/120                           | <0.01                      | Fig 1B         |

|                                              |      |           |     |      |         |        |                  |
|----------------------------------------------|------|-----------|-----|------|---------|--------|------------------|
| Wild-type<br>/ <i>mfn-1</i> RNAi             | PA14 | 153.0±4.0 | 183 | 41%  | 110/120 | <0.001 | Fig 1B           |
| Wild-type<br>/Control RNAi                   | PA14 | 104.7±2.8 | 126 |      | 112/120 |        | Fig 1B           |
| Wild-type<br>/ <i>C34C12.8</i> RNAi          | PA14 | 132.8±4.6 | 186 | 27%  | 111/120 | <0.001 | Fig 1B           |
| Wild-type<br>/ <i>mrps-5</i> RNAi            | PA14 | 135.1±4.1 | 168 | 29%  | 114/120 | <0.001 | Fig 1B           |
| Wild-type<br>/ <i>mrps-18c</i> RNAi          | PA14 | 138.2±4.5 | 174 | 32%  | 115/120 | <0.001 | Fig 1B           |
| Wild-type<br>/ <i>dap-3</i> RNAi             | PA14 | 140.9±4.3 | 174 | 35%  | 114/120 | <0.001 | Fig 1B           |
| <i>pmk-1(km25)</i><br>/Control RNAi          | PA14 | 51.0±1.1  | 65  |      | 111/120 |        | Fig 1B<br>and 4G |
| <i>pmk-1(km25)</i><br>/ <i>hsp-60</i> RNAi   | PA14 | 50.9±0.9  | 65  | 0%   | 119/120 | 0.4613 | Fig 1B<br>and 4G |
| <i>pmk-1(km25)</i><br>/ <i>dap-3</i> RNAi    | PA14 | 69.0±1.8  | 80  | 35%  | 117/120 | <0.001 | Fig 1B<br>and 4G |
| <i>pmk-1(km25)</i><br>/Control RNAi          | PA14 | 47.3±1.6  | 56  |      | 120/120 |        | Fig 1B           |
| <i>pmk-1(km25)</i><br>/ <i>hsp-60</i> RNAi   | PA14 | 61.0±1.4  | 73  | 29%  | 120/120 | <0.001 | Fig 1B           |
| <i>pmk-1(km25)</i><br>/ <i>dap-3</i> RNAi    | PA14 | 70.2±1.9  | 79  | 49%  | 120/120 | <0.001 | Fig 1B           |
| <i>pmk-1(km25)</i><br>/Control RNAi          | PA14 | 46.7±1.2  | 52  |      | 94/120  |        | Fig 1B           |
| <i>pmk-1(km25)</i><br>/ <i>ads-1</i> RNAi    | PA14 | 45.3±1.6  | 52  | -3%  | 44/60   | 0.5341 | Fig 1B           |
| <i>pmk-1(km25)</i><br>/ <i>glrx-5</i> RNAi   | PA14 | 44.1±1.1  | 52  | -6%  | 82/110  | 0.1535 | Fig 1B           |
| <i>pmk-1(km25)</i><br>/ <i>ZK669.4</i> RNAi  | PA14 | 41.1±1.1  | 52  | -12% | 93/120  | <0.01  | Fig 1B           |
| <i>pmk-1(km25)</i><br>/ <i>idh-2</i> RNAi    | PA14 | 47.9±1.1  | 58  | 3%   | 108/120 | 0.3541 | Fig 1B           |
| <i>pmk-1(km25)</i><br>/ <i>lpd-5</i> RNAi    | PA14 | 63.2±1.9  | 70  | 35%  | 111/120 | <0.001 | Fig 1B           |
| <i>pmk-1(km25)</i><br>/ <i>alh-7</i> RNAi    | PA14 | 47.4±1.2  | 52  | 2%   | 103/120 | 0.5916 | Fig 1B           |
| <i>pmk-1(km25)</i><br>/ <i>F53F4.10</i> RNAi | PA14 | 75.0±1.7  | 81  | 61%  | 96/120  | <0.001 | Fig 1B           |
| <i>pmk-1(km25)</i><br>/ <i>C34C12.8</i> RNAi | PA14 | 63.8±1.7  | 75  | 37%  | 95/120  | <0.001 | Fig 1B           |

|                                              |      |          |    |      |         |        |        |
|----------------------------------------------|------|----------|----|------|---------|--------|--------|
| <i>pmk-1(km25)</i><br>/Control RNAi          | PA14 | 52.5±1.4 | 70 |      | 114/120 |        | Fig 1B |
| <i>pmk-1(km25)</i><br>/ <i>ads-1</i> RNAi    | PA14 | 46.2±1.7 | 54 | -12% | 92/100  | <0.001 | Fig 1B |
| <i>pmk-1(km25)</i><br>/ <i>glrx-5</i> RNAi   | PA14 | 59.8±1.5 | 74 | 14%  | 105/111 | <0.01  | Fig 1B |
| <i>pmk-1(km25)</i><br>/ <i>ZK669.4</i> RNAi  | PA14 | 41.1±1.4 | 48 | -22% | 104/114 | <0.001 | Fig 1B |
| <i>pmk-1(km25)</i><br>/ <i>idh-2</i> RNAi    | PA14 | 54.8±1.2 | 69 | 4%   | 118/120 | 0.3174 | Fig 1B |
| <i>pmk-1(km25)</i><br>/ <i>lpd-5</i> RNAi    | PA14 | 71.2±1.8 | 80 | 36%  | 114/120 | <0.001 | Fig 1B |
| <i>pmk-1(km25)</i><br>/Control RNAi          | PA14 | 49.6±1.2 | 58 |      | 117/120 |        | Fig 1B |
| <i>pmk-1(km25)</i><br>/ <i>alh-7</i> RNAi    | PA14 | 46.8±1.0 | 58 | -6%  | 116/120 | <0.05  | Fig 1B |
| <i>pmk-1(km25)</i><br>/ <i>F53F4.10</i> RNAi | PA14 | 63.6±1.7 | 71 | 28%  | 116/120 | <0.001 | Fig 1B |
| <i>pmk-1(km25)</i><br>/ <i>C34C12.8</i> RNAi | PA14 | 82.0±2.3 | 98 | 65%  | 85/90   | <0.001 | Fig 1B |
| <i>pmk-1(km25)</i><br>/Control RNAi          | PA14 | 50.5±1.3 | 58 |      | 110/120 |        | Fig 1B |
| <i>pmk-1(km25)</i><br>/ <i>lars-2</i> RNAi   | PA14 | 61.9±1.2 | 71 | 22%  | 108/120 | <0.001 | Fig 1B |
| <i>pmk-1(km25)</i><br>/ <i>mrps-5</i> RNAi   | PA14 | 63.8±2.1 | 71 | 26%  | 112/120 | <0.001 | Fig 1B |
| <i>pmk-1(km25)</i><br>/ <i>mrps-18c</i> RNAi | PA14 | 66.7±2.2 | 71 | 32%  | 112/120 | <0.001 | Fig 1B |
| <i>pmk-1(km25)</i><br>/ <i>mrpl-22</i> RNAi  | PA14 | 66.7±2.2 | 82 | 32%  | 114/120 | <0.001 | Fig 1B |
| <i>pmk-1(km25)</i><br>/ <i>mfn-1</i> RNAi    | PA14 | 64.1±1.7 | 82 | 27%  | 113/120 | <0.001 | Fig 1B |
| <i>pmk-1(km25)</i><br>/ <i>mrps-35</i> RNAi  | PA14 | 61.6±1.7 | 71 | 22%  | 108/120 | <0.001 | Fig 1B |
| <i>pmk-1(km25)</i><br>/Control RNAi          | PA14 | 45.6±1.2 | 57 |      | 101/120 |        | Fig 1B |
| <i>pmk-1(km25)</i><br>/ <i>lars-2</i> RNAi   | PA14 | 63.2±1.8 | 72 | 39%  | 111/120 | <0.001 | Fig 1B |
| <i>pmk-1(km25)</i><br>/ <i>mrps-5</i> RNAi   | PA14 | 75.4±2.3 | 91 | 65%  | 112/120 | <0.001 | Fig 1B |

|                                                |      |          |     |      |         |        |                  |
|------------------------------------------------|------|----------|-----|------|---------|--------|------------------|
| <i>pmk-1(km25)</i><br>/ <i>mrps-18c</i> RNAi   | PA14 | 70.2±1.7 | 79  | 54%  | 116/120 | <0.001 | Fig 1B           |
| <i>pmk-1(km25)</i><br>/ <i>mrpl-22</i> RNAi    | PA14 | 68.1±2.0 | 79  | 49%  | 114/120 | <0.001 | Fig 1B           |
| <i>pmk-1(km25)</i><br>/ <i>mfn-1</i> RNAi      | PA14 | 59.6±1.6 | 66  | 31%  | 105/120 | <0.001 | Fig 1B           |
| <i>pmk-1(km25)</i><br>/ <i>mrps-35</i> RNAi    | PA14 | 70.8±2.0 | 79  | 55%  | 116/120 | <0.001 | Fig 1B           |
| <i>zip-2(tm4067)</i><br>/Control RNAi          | PA14 | 91.1±2.4 | 100 |      | 77/90   |        | Fig 1B<br>and 4H |
| <i>zip-2(tm4067)</i><br>/ <i>hsp-60</i> RNAi   | PA14 | 64.3±0.8 | 72  | -30% | 114/120 | <0.001 | Fig 1B<br>and 4H |
| <i>zip-2(tm4067)</i><br>/Control RNAi          | PA14 | 88.2±1.9 | 93  |      | 115/120 |        | Fig 1B           |
| <i>zip-2(tm4067)</i><br>/ <i>hsp-60</i> RNAi   | PA14 | 75.5±1.0 | 82  | -15% | 113/120 | <0.001 | Fig 1B           |
| <i>zip-2(tm4067)</i><br>/Control RNAi          | PA14 | 86.8±2.1 | 98  |      | 116/120 |        | Fig 1B           |
| <i>zip-2(tm4067)</i><br>/ <i>ads-1</i> RNAi    | PA14 | 64.6±1.4 | 72  | -26% | 120/122 | <0.001 | Fig 1B           |
| <i>zip-2(tm4067)</i><br>/ <i>glrx-5</i> RNAi   | PA14 | 81.3±2.0 | 92  | -6%  | 115/120 | 0.0791 | Fig 1B           |
| <i>zip-2(tm4067)</i><br>/ <i>ZK669.4</i> RNAi  | PA14 | 83.7±1.9 | 92  | -4%  | 107/120 | 0.2519 | Fig 1B           |
| <i>zip-2(tm4067)</i><br>/ <i>idh-2</i> RNAi    | PA14 | 84.9±1.9 | 92  | -2%  | 114/120 | 0.4756 | Fig 1B           |
| <i>zip-2(tm4067)</i><br>/ <i>lpd-5</i> RNAi    | PA14 | 87.1±2.1 | 98  | 0%   | 111/120 | 0.8901 | Fig 1B           |
| <i>zip-2(tm4067)</i><br>/ <i>alh-7</i> RNAi    | PA14 | 77.3±1.3 | 92  | -11% | 107/120 | <0.001 | Fig 1B           |
| <i>zip-2(tm4067)</i><br>/ <i>F53F4.10</i> RNAi | PA14 | 74.8±2.1 | 79  | -14% | 106/120 | <0.001 | Fig 1B           |
| <i>zip-2(tm4067)</i><br>/Control RNAi          | PA14 | 87.2±1.9 | 104 |      | 108/120 |        | Fig 1B           |
| <i>zip-2(tm4067)</i><br>/ <i>ads-1</i> RNAi    | PA14 | 70.2±1.6 | 80  | -20% | 116/120 | <0.001 | Fig 1B           |
| <i>zip-2(tm4067)</i><br>/ <i>glrx-5</i> RNAi   | PA14 | 94.3±2.4 | 103 | 8%   | 116/120 | 0.1149 | Fig 1B           |
| <i>zip-2(tm4067)</i><br>/ <i>ZK669.4</i> RNAi  | PA14 | 85.3±1.9 | 92  | -2%  | 123/125 | <0.05  | Fig 1B           |

|                                               |      |           |     |      |         |        |        |
|-----------------------------------------------|------|-----------|-----|------|---------|--------|--------|
| <i>zip-2(tm4067)</i><br><i>/idh-2 RNAi</i>    | PA14 | 97.0±2.5  | 116 | 11%  | 115/120 | 0.0946 | Fig 1B |
| <i>zip-2(tm4067)</i><br><i>/lpd-5 RNAi</i>    | PA14 | 89.2±2.3  | 103 | 2%   | 125/127 | 0.7772 | Fig 1B |
| <i>zip-2(tm4067)</i><br><i>/alh-7 RNAi</i>    | PA14 | 89.8±2.1  | 103 | 3%   | 116/120 | 0.9841 | Fig 1B |
| <i>zip-2(tm4067)</i><br><i>/F53F4.10 RNAi</i> | PA14 | 85.4±3.0  | 102 | -2%  | 104/110 | 0.3744 | Fig 1B |
| <i>zip-2(tm4067)</i><br><i>/Control RNAi</i>  | PA14 | 108.0±2.8 | 119 |      | 79/90   |        | Fig 1B |
| <i>zip-2(tm4067)</i><br><i>/C34C12.8 RNAi</i> | PA14 | 134.9±4.7 | 165 | 25%  | 79/90   | <0.001 | Fig 1B |
| <i>zip-2(tm4067)</i><br><i>/dap-3 RNAi</i>    | PA14 | 136.9±5.0 | 176 | 27%  | 84/90   | <0.001 | Fig 1B |
| <i>zip-2(tm4067)</i><br><i>/Control RNAi</i>  | PA14 | 110.4±3.1 | 130 |      | 87/90   |        | Fig 1B |
| <i>zip-2(tm4067)</i><br><i>/C34C12.8 RNAi</i> | PA14 | 125.2±6.0 | 166 | 13%  | 85/90   | <0.001 | Fig 1B |
| <i>zip-2(tm4067)</i><br><i>/dap-3 RNAi</i>    | PA14 | 150.3±6.7 | 202 | 36%  | 86/90   | <0.001 | Fig 1B |
| <i>zip-2(tm4067)</i><br><i>/Control RNAi</i>  | PA14 | 139.1±2.6 | 154 |      | 116/120 |        | Fig 1B |
| <i>zip-2(tm4067)</i><br><i>/lars-1 RNAi</i>   | PA14 | 118.8±3.9 | 143 | -15% | 190/120 | <0.05  | Fig 1B |
| <i>zip-2(tm4067)</i><br><i>/mrps-5 RNAi</i>   | PA14 | 168.4±5.3 | 213 | 21%  | 112/120 | <0.001 | Fig 1B |
| <i>zip-2(tm4067)</i><br><i>/mrps-18c RNAi</i> | PA14 | 147.8±4.9 | 191 | 6%   | 115/120 | <0.01  | Fig 1B |
| <i>zip-2(tm4067)</i><br><i>/mrpl-22 RNAi</i>  | PA14 | 129.7±4.8 | 154 | -7%  | 117/120 | 0.8495 | Fig 1B |
| <i>zip-2(tm4067)</i><br><i>/mfn-1 RNAi</i>    | PA14 | 123.7±4.0 | 165 | -11% | 117/120 | 0.2006 | Fig 1B |
| <i>zip-2(tm4067)</i><br><i>/mrps-35 RNAi</i>  | PA14 | 154.6±5.1 | 202 | 11%  | 116/120 | <0.001 | Fig 1B |
| <i>zip-2(tm4067)</i><br><i>/Control RNAi</i>  | PA14 | 135.1±3.2 | 153 |      | 104/120 |        | Fig 1B |
| <i>zip-2(tm4067)</i><br><i>/lars-1 RNAi</i>   | PA14 | 120.5±3.9 | 123 | -11% | 91/120  | <0.05  | Fig 1B |
| <i>zip-2(tm4067)</i><br><i>/mrps-5 RNAi</i>   | PA14 | 147.8±5.1 | 189 | 9%   | 104/120 | <0.01  | Fig 1B |

|                                               |      |           |      |      |         |        |                  |
|-----------------------------------------------|------|-----------|------|------|---------|--------|------------------|
| <i>zip-2(tm4067)</i><br><i>/mprs-18c</i> RNAi | PA14 | 141.6±5.2 | 178  | 5%   | 104/120 | 0.1886 | Fig 1B           |
| <i>zip-2(tm4067)</i><br><i>/mrpl-22</i> RNAi  | PA14 | 129.8±5.0 | 141  | -4%  | 103/120 | 0.3946 | Fig 1B           |
| <i>zip-2(tm4067)</i><br><i>/mfn-1</i> RNAi    | PA14 | 125.7±4.5 | 141  | -7%  | 100/120 | 0.2709 | Fig 1B           |
| <i>zip-2(tm4067)</i><br><i>/mrps-35</i> RNAi  | PA14 | 132.0±4.4 | 153  | -2%  | 108/120 | 0.8304 | Fig 1B           |
| <i>daf-16(mu86)</i><br><i>/Control</i> RNAi   | PA14 | 104.8±1.7 | 113  |      | 117/120 |        | Fig 1B<br>and 4I |
| <i>daf-16(mu86)</i><br><i>/hsp-60</i> RNAi    | PA14 | 75.8±1.2  | 93   | -28% | 112/120 | <0.001 | Fig 1B<br>and 4I |
| <i>daf-16(mu86)</i><br><i>/glrx-5</i> RNAi    | PA14 | 90.4±2.0  | 102  | -14% | 117/120 | <0.001 | Fig 1B           |
| <i>daf-16(mu86)</i><br><i>/ZK669.4</i> RNAi   | PA14 | 80.7±2.1  | 92.5 | -23% | 98/107  | <0.001 | Fig 1B           |
| <i>daf-16(mu86)</i><br><i>/idh-2</i> RNAi     | PA14 | 84.7±1.9  | 102  | -19% | 116/120 | <0.001 | Fig 1B           |
| <i>daf-16(mu86)</i><br><i>/Control</i> RNAi   | PA14 | 96.1±2.4  | 111  |      | 112/120 |        | Fig 1B           |
| <i>daf-16(mu86)</i><br><i>/hsp-60</i> RNAi    | PA14 | 77.1±1.7  | 88   | -20% | 87/120  | <0.001 | Fig 1B           |
| <i>daf-16(mu86)</i><br><i>/glrx-5</i> RNAi    | PA14 | 74.8±2.1  | 88   | -22% | 107/120 | <0.001 | Fig 1B           |
| <i>daf-16(mu86)</i><br><i>/ZK669.4</i> RNAi   | PA14 | 84.2±2.1  | 100  | -16% | 117/120 | <0.001 | Fig 1B           |
| <i>daf-16(mu86)</i><br><i>/idh-2</i> RNAi     | PA14 | 87.4±2.4  | 111  | -9%  | 116/120 | <0.05  | Fig 1B           |
| <i>daf-16(mu86)</i><br><i>/Control</i> RNAi   | PA14 | 102.0±1.8 | 114  |      | 99/120  |        | Fig 1B           |
| <i>daf-16(mu86)</i><br><i>/ads-1</i> RNAi     | PA14 | 94.3±2.3  | 114  | -8%  | 111/120 | <0.001 | Fig 1B           |
| <i>daf-16(mu86)</i><br><i>/lpd-5</i> RNAi     | PA14 | 96.8±2.0  | 114  | -5%  | 112/120 | 0.0722 | Fig 1B           |
| <i>daf-16(mu86)</i><br><i>/alh-7</i> RNAi     | PA14 | 98.5±2.3  | 114  | -4%  | 92/120  | 0.0906 | Fig 1B           |
| <i>daf-16(mu86)</i><br><i>/F53F4.10</i> RNAi  | PA14 | 113.7±2.2 | 125  | 11%  | 113/120 | 0.4087 | Fig 1B           |
| <i>daf-16(mu86)</i><br><i>/C32C12.8</i> RNAi  | PA14 | 12.8±3.2  | 149  | 25%  | 103/120 | <0.001 | Fig 1B           |

|                                               |      |           |     |      |         |        |        |
|-----------------------------------------------|------|-----------|-----|------|---------|--------|--------|
| <i>daf-16(mu86)</i><br>/Control RNAi          | PA14 | 99.5±2.5  | 121 |      | 104/120 |        | Fig 1B |
| <i>daf-16(mu86)</i><br>/ <i>ads-1</i> RNAi    | PA14 | 93.1±2.4  | 111 | -6%  | 110/120 | 0.0553 | Fig 1B |
| <i>daf-16(mu86)</i><br>/ <i>lpd-5</i> RNAi    | PA14 | 87.7±1.7  | 111 | -12% | 120/120 | <0.001 | Fig 1B |
| <i>daf-16(mu86)</i><br>/ <i>alh-7</i> RNAi    | PA14 | 99.5±2.3  | 121 | 0%   | 120/120 | 0.8827 | Fig 1B |
| <i>daf-16(mu86)</i><br>/ <i>F53F4.10</i> RNAi | PA14 | 84.6±1.8  | 95  | -15% | 117/120 | <0.001 | Fig 1B |
| <i>daf-16(mu86)</i><br>/ <i>C32C12.8</i> RNAi | PA14 | 91.8±2.8  | 111 | -8%  | 120/120 | 0.1850 | Fig 1B |
| <i>daf-16(mu86)</i><br>/Control RNAi          | PA14 | 103.0±2.5 | 120 |      | 110/120 |        | Fig 1B |
| <i>daf-16(mu86)</i><br>/ <i>lars-2</i> RNAi   | PA14 | 102.9±2.9 | 120 | 0%   | 108/120 | 0.6444 | Fig 1B |
| <i>daf-16(mu86)</i><br>/ <i>mrps-5</i> RNAi   | PA14 | 131.1±3.3 | 153 | 27%  | 103/120 | <0.001 | Fig 1B |
| <i>daf-16(mu86)</i><br>/ <i>mrps-18c</i> RNAi | PA14 | 119.7±3.7 | 153 | 16%  | 96/120  | <0.001 | Fig 1B |
| <i>daf-16(mu86)</i><br>/ <i>mrpl-22</i> RNAi  | PA14 | 110.5±3.5 | 141 | 7%   | 96/120  | <0.05  | Fig 1B |
| <i>daf-16(mu86)</i><br>/ <i>mfn-1</i> RNAi    | PA14 | 122.9±3.5 | 141 | 19%  | 99/120  | <0.001 | Fig 1B |
| <i>daf-16(mu86)</i><br>/ <i>mrps-35</i> RNAi  | PA14 | 120.1±3.8 | 153 | 17%  | 107/120 | <0.001 | Fig 1B |
| <i>daf-16(mu86)</i><br>/Control RNAi          | PA14 | 90.5±2.8  | 105 |      | 94/120  |        | Fig 1B |
| <i>daf-16(mu86)</i><br>/ <i>lars-2</i> RNAi   | PA14 | 90.9±2.5  | 105 | 1%   | 100/120 | 0.5847 | Fig 1B |
| <i>daf-16(mu86)</i><br>/ <i>mrps-5</i> RNAi   | PA14 | 112.2±3.6 | 139 | 24%  | 111/120 | <0.001 | Fig 1B |
| <i>daf-16(mu86)</i><br>/ <i>mrps-18c</i> RNAi | PA14 | 104.4±3.8 | 129 | 15%  | 106/120 | <0.01  | Fig 1B |
| <i>daf-16(mu86)</i><br>/ <i>mrpl-22</i> RNAi  | PA14 | 96.4±3.4  | 117 | 7%   | 96/120  | 0.1677 | Fig 1B |
| <i>daf-16(mu86)</i><br>/ <i>mfn-1</i> RNAi    | PA14 | 95.8±3.8  | 117 | 6%   | 104/120 | 0.3531 | Fig 1B |
| <i>daf-16(mu86)</i><br>/ <i>mrps-35</i> RNAi  | PA14 | 104.5±3.4 | 129 | 16%  | 98/120  | <0.01  | Fig 1B |

|                                            |      |           |     |     |       |        |        |
|--------------------------------------------|------|-----------|-----|-----|-------|--------|--------|
| <i>daf-16(mu86)</i><br>/Control RNAi       | PA14 | 114.3±2.0 | 132 |     | 85/90 |        | Fig 1B |
| <i>daf-16(mu86)</i><br>/ <i>dap-3</i> RNAi | PA14 | 132.1±3.6 | 147 | 16% | 78/90 | <0.001 | Fig 1B |
| <i>daf-16(mu86)</i><br>/Control RNAi       | PA14 | 113.0±2.4 | 130 |     | 90/90 |        | Fig 1B |
| <i>daf-16(mu86)</i><br>/ <i>dap-3</i> RNAi | PA14 | 128.8±3.8 | 155 | 14% | 86/90 | <0.001 | Fig 1B |

The experiments for the survival data within the solid line were done in parallel. Statistical analysis was done for the data sets within the solid line. Percent (%) changes in mean survival and *p* values of the animals treated with each RNAi clone were calculated against the animals treated with control RNAi. All the *p* values were calculated using the log-rank (Mantel-Cox method) test.



**Appendix Table S2. The effects of *hsp-60* RNAi on the survival of *C. elegans* on various bacteria.**

| Strain /treatment               | Bacteria               | Mean survival $\pm$ s.e.m. (hours) | Hours at 75% mortality | % change | Number of animals that died/total | <i>p</i> value vs. control | Figure in text |
|---------------------------------|------------------------|------------------------------------|------------------------|----------|-----------------------------------|----------------------------|----------------|
| Wild-type /control RNAi         | PA14                   | 109.2 $\pm$ 2.5                    | 130                    |          | 113/120                           |                            | Fig 2A         |
| Wild-type / <i>hsp-60</i> RNAi  | PA14                   | 61.9 $\pm$ 1.1                     | 73                     | -43%     | 118/120                           | <0.001                     | Fig 2A         |
| Wild-type /control RNAi         | PA14                   | 129.0 $\pm$ 3.2                    | 153                    |          | 116/120                           |                            |                |
| Wild-type / <i>hsp-60</i> RNAi  | PA14                   | 75.2 $\pm$ 1.1                     | 92                     | -42%     | 118/125                           | <0.001                     |                |
| Wild-type /control RNAi         | PA14                   | 150.2 $\pm$ 4.2                    | 169                    |          | 80/90                             |                            |                |
| Wild-type / <i>hsp-60</i> RNAi  | PA14                   | 110.8 $\pm$ 2.9                    | 132                    | -26%     | 76/90                             | <0.001                     |                |
| Wild-type /control RNAi         | PA14                   | 129.5 $\pm$ 2.8                    | 143                    |          | 83/90                             |                            |                |
| Wild-type / <i>hsp-60</i> RNAi  | PA14                   | 93.3 $\pm$ 2.2                     | 106                    | -28%     | 89/90                             | <0.001                     |                |
| #Wild-type /control RNAi        | PA14                   | 98.9 $\pm$ 4.0                     | 142                    |          | 53/90                             |                            | AF S2A         |
| #Wild-type / <i>hsp-60</i> RNAi | PA14                   | 77.9 $\pm$ 2.1                     | 104                    | -21%     | 82/90                             | <0.001                     | AF S2A         |
| #Wild-type / <i>pmk-1</i> RNAi  | PA14                   | 40.5 $\pm$ 0.8                     | -                      | -59%     | 85/90                             | <0.001                     | AF S2A         |
| #Wild-type /control RNAi        | PA14                   | 94.6 $\pm$ 4.5                     | 126                    |          | 66/90                             |                            |                |
| #Wild-type / <i>hsp-60</i> RNAi | PA14                   | 83.7 $\pm$ 2.3                     | 102                    | -12%     | 72/90                             | <0.05                      |                |
| #Wild-type / <i>pmk-1</i> RNAi  | PA14                   | 45.3 $\pm$ 0.7                     | -                      | -52%     | 78/90                             | <0.001                     |                |
| Wild-type /control RNAi         | <i>E. coli</i> (HT115) | 20.5 $\pm$ 0.4                     | 23                     |          | 107/120                           |                            | Fig 2G         |
| Wild-type / <i>hsp-60</i> RNAi  | <i>E. coli</i> (HT115) | 19.2 $\pm$ 0.3                     | 22                     | -6%      | 114/120                           | <0.01                      | Fig 2G         |
| Wild-type /control RNAi         | <i>E. coli</i> (HT115) | 15.7 $\pm$ 0.3                     | 20                     |          | 108/150                           |                            |                |

|                                    |                              |          |    |      |         |        |                         |
|------------------------------------|------------------------------|----------|----|------|---------|--------|-------------------------|
| Wild type<br>/ <i>hsp-60</i> RNAi  | <i>E. coli</i><br>(HT115)    | 14.9±0.3 | 17 | -5%  | 112/150 | <0.05  |                         |
| #Wild-type<br>/control RNAi        | <i>E. faecalis</i>           | 5.9±0.2  | 7  |      | 43/120  |        | Fig 2H<br>and AF<br>S2B |
| #Wild-type<br>/ <i>hsp-60</i> RNAi | <i>E. faecalis</i>           | 6.2±0.2  | 8  | 6%   | 80/120  | 0.1907 | Fig 2H                  |
| #Wild-type<br>/ <i>pmk-1</i> RNAi  | <i>E. faecalis</i>           | 3.7±0.2  | 5  | -36% | 61/120  | <0.001 | AF S2B                  |
| #Wild-type<br>/control RNAi        | <i>E. faecalis</i>           | 6.8±0.3  | 8  |      | 58/120  |        |                         |
| #Wild-type<br>/ <i>hsp-60</i> RNAi | <i>E. faecalis</i>           | 5.9±0.2  | 7  | -13% | 104/120 | <0.01  |                         |
| #Wild-type<br>/ <i>pmk-1</i> RNAi  | <i>E. faecalis</i>           | 4.5±0.2  | 6  | -34% | 74/120  | <0.001 |                         |
| Wild-type<br>/control RNAi         | Pathogenic<br><i>E. coli</i> | 7.2±0.2  | 9  |      | 103/120 |        | Fig 2I<br>and AF<br>S2C |
| Wild-type<br>/ <i>hsp-60</i> RNAi  | Pathogenic<br><i>E. coli</i> | 6.8±0.1  | 9  | -6%  | 98/120  | <0.001 | Fig 2I                  |
| Wild-type<br>/ <i>pmk-1</i> RNAi   | Pathogenic<br><i>E. coli</i> | 5.2±0.2  | 7  | -27% | 88/120  | <0.001 | AF S2C                  |
| Wild-type<br>/control RNAi         | Pathogenic<br><i>E. coli</i> | 8.5±0.2  | 10 |      | 120/120 |        |                         |
| Wild-type<br>/ <i>hsp-60</i> RNAi  | Pathogenic<br><i>E. coli</i> | 7.8±0.1  | 10 | -8%  | 94/120  | <0.001 |                         |
| Wild-type<br>/ <i>pmk-1</i> RNAi   | Pathogenic<br><i>E. coli</i> | 6.4±0.2  | 9  | -24% | 114/120 | <0.001 |                         |

The experiments for the survival data within the solid line were done in parallel. Statistical analysis was done for the data sets within the solid line. Percent (%) changes in mean survival and *p* values of the animals treated with *hsp-60* or *pmk-1* RNAi were calculated against the animals treated with control RNAi. All the *p* values were calculated using the log-rank (Mantel-Cox method) test. # indicates that survival analysis was performed without FUdR. AF indicates Appendix Figure.

**Appendix Table S3. The effects of tissue-specific *hsp-60* RNAi on the survival of *C. elegans* exposed to PA14.**

| Strain /treatment                                       | Bacteria | Mean survival $\pm$ s.e.m. (hours) | Hours at 75% mortality | % change | Number of animals that died/total | <i>p</i> value vs. control | Figure in text |
|---------------------------------------------------------|----------|------------------------------------|------------------------|----------|-----------------------------------|----------------------------|----------------|
| <i>rde-1(ne219)</i> /control RNAi                       | PA14     | 98.0 $\pm$ 2.2                     | 116                    |          | 80/90                             |                            | Fig 3E         |
| <i>rde-1(ne219)</i> / <i>hsp-60</i> RNAi                | PA14     | 97.6 $\pm$ 2.3                     | 116                    | 0%       | 88/90                             | 0.9838                     | Fig 3E         |
| <i>rde-1(ne219)</i> /control RNAi                       | PA14     | 92.6 $\pm$ 2.0                     | 102                    |          | 75/90                             |                            |                |
| <i>rde-1(ne219)</i> / <i>hsp-60</i> RNAi                | PA14     | 97.7 $\pm$ 2.5                     | 115                    | 5%       | 61/90                             | 0.1110                     |                |
| <i>rde-1(ne219); nhx-2p::rde-1</i> /control RNAi        | PA14     | 129.9 $\pm$ 2.9                    | 142                    |          | 75/90                             |                            | Fig 3A         |
| <i>rde-1(ne219); nhx-2p::rde-1</i> / <i>hsp-60</i> RNAi | PA14     | 104.0 $\pm$ 1.5                    | 116                    | -20%     | 90/90                             | <0.001                     | Fig 3A         |
| <i>rde-1(ne219); nhx-2p::rde-1</i> /control RNAi        | PA14     | 119.4 $\pm$ 3.6                    | 137                    |          | 77/90                             |                            |                |
| <i>rde-1(ne219); nhx-2p::rde-1</i> / <i>hsp-60</i> RNAi | PA14     | 101.0 $\pm$ 2.0                    | 115                    | -15%     | 78/90                             | <0.001                     |                |
| <i>rde-1(ne219); hlh-1p::rde-1</i> /control RNAi        | PA14     | 105.9 $\pm$ 3.6                    | 128                    |          | 57/60                             |                            | Fig 3C         |
| <i>rde-1(ne219); hlh-1p::rde-1</i> / <i>hsp-60</i> RNAi | PA14     | 103.1 $\pm$ 6.0                    | 128                    | -3%      | 27/30                             | 0.7746                     | Fig 3C         |
| <i>rde-1(ne219); hlh-1p::rde-1</i> /control RNAi        | PA14     | 89.1 $\pm$ 2.5                     | 102                    |          | 61/90                             |                            |                |
| <i>rde-1(ne219); hlh-1p::rde-1</i> / <i>hsp-60</i> RNAi | PA14     | 81.5 $\pm$ 2.9                     | 90                     | -9%      | 52/90                             | 0.0682                     |                |
| <i>rde-1(ne219); lin-26p::rde-1</i> /control RNAi       | PA14     | 116.6 $\pm$ 2.9                    | 142                    |          | 87/90                             |                            | Fig 3D         |

|                                                                    |      |           |     |      |       |        |        |
|--------------------------------------------------------------------|------|-----------|-----|------|-------|--------|--------|
| <i>rde-1(ne219);<br/>lin-26p::<i>rde-1</i><br/>/hsp-60 RNAi</i>    | PA14 | 111.0±3.2 | 128 | -5%  | 85/90 | 0.3467 | Fig 3D |
| <i>rde-1(ne219);<br/>lin-26p::<i>rde-1</i><br/>/control RNAi</i>   | PA14 | 103.1±3.0 | 126 |      | 76/90 |        |        |
| <i>rde-1(ne219);<br/>lin-26p::<i>rde-1</i><br/>/hsp-60 RNAi</i>    | PA14 | 97.9±3.3  | 115 | -5%  | 80/90 | 0.4159 |        |
| <i>sid-1(pk3321)<br/>/control RNAi</i>                             | PA14 | 136.6±3.5 | 157 |      | 84/90 |        | Fig 3F |
| <i>sid-1(pk3321)<br/>/hsp-60 RNAi</i>                              | PA14 | 134.9±3.6 | 157 | -1%  | 86/90 | 0.9094 | Fig 3F |
| <i>sid-1(pk3321)<br/>/control RNAi</i>                             | PA14 | 161.0±4.2 | 192 |      | 85/90 |        |        |
| <i>sid-1(pk3321)<br/>/hsp-60 RNAi</i>                              | PA14 | 151.2±4.2 | 181 | -6%  | 79/90 | 0.1009 |        |
| <i>sid-1(pk3321);<br/>unc-119p::<i>sid-1</i><br/>/control RNAi</i> | PA14 | 123.0±4.0 | 143 |      | 75/90 |        | Fig 3B |
| <i>sid-1(pk3321);<br/>unc-119p::<i>sid-1</i><br/>/hsp-60 RNAi</i>  | PA14 | 83.9±1.8  | 95  | -32% | 86/90 | <0.001 | Fig 3B |
| <i>sid-1(pk3321);<br/>unc-119p::<i>sid-1</i><br/>/control RNAi</i> | PA14 | 139.8±4.7 | 169 |      | 70/90 |        |        |
| <i>sid-1(pk3321);<br/>unc-119p::<i>sid-1</i><br/>/hsp-60 RNAi</i>  | PA14 | 84.3±1.8  | 95  | -40% | 73/90 | <0.001 |        |

The experiments for the survival data within the solid line were done in parallel. Statistical analysis was done for the data sets within the solid line. Percent (%) changes in mean survival and *p* values of the animals treated with *hsp-60* RNAi were calculated against the animals treated with control RNAi. All the *p* values were calculated using the log-rank (Mantel-Cox method) test.

**Appendix Table S4. The effects of genetic inhibition of UPR<sup>MT</sup> components on the survival of *C. elegans* on PA14.**

| Strain /treatment             | Bacteria | Mean survival $\pm$ s.e.m. (hours) | Hours at 75% mortality | % change | Number of animals that died/total | <i>p</i> value vs. control | Figure in text    |
|-------------------------------|----------|------------------------------------|------------------------|----------|-----------------------------------|----------------------------|-------------------|
| Wild-type /control RNAi       | PA14     | 91.1 $\pm$ 1.6                     | 96                     |          | 111/120                           |                            | Fig EV1A          |
| Wild-type / <i>dve-1</i> RNAi | PA14     | 48.2 $\pm$ 0.8                     | 60                     | -47%     | 110/120                           | <0.001                     | Fig EV1A          |
| Wild-type /control RNAi       | PA14     | 77.6 $\pm$ 2.2                     | 91                     |          | 108/120                           |                            |                   |
| Wild-type / <i>dve-1</i> RNAi | PA14     | 42.0 $\pm$ 0.8                     | 54                     | -45%     | 113/120                           | <0.001                     |                   |
| Wild-type /control RNAi       | PA14     | 115.2 $\pm$ 2.0                    | 126                    |          | 106/120                           |                            | Fig EV1B          |
| Wild-type / <i>ubl-5</i> RNAi | PA14     | 96.6 $\pm$ 2.6                     | 117                    | -16%     | 116/120                           | <0.001                     | Fig EV1B          |
| Wild-type /control RNAi       | PA14     | 110.9 $\pm$ 2.3                    | 122                    |          | 120/120                           |                            |                   |
| Wild-type / <i>ubl-5</i> RNAi | PA14     | 88.7 $\pm$ 3.5                     | 107                    | -20%     | 113/120                           | <0.001                     |                   |
| Wild-type                     | PA14     | 96.5 $\pm$ 2.9                     | 126                    |          | 102/120                           |                            | Fig EV1C and EV1D |
| <i>atfs-1(gk3094)</i>         | PA14     | 75.7 $\pm$ 2.0                     | 86                     | -22%     | 105/120                           | <0.001                     | Fig EV1C          |
| <i>haf-1(ok705)</i>           | PA14     | 93.0 $\pm$ 2.8                     | 110                    | -4%      | 108/120                           | 0.3885                     | Fig EV1D          |
| Wild-type                     | PA14     | 85.0 $\pm$ 3.1                     | 104                    |          | 105/120                           |                            |                   |
| <i>atfs-1(gk3094)</i>         | PA14     | 67.8 $\pm$ 2.3                     | 82                     | -20%     | 79/101                            | <0.001                     |                   |
| <i>haf-1(ok705)</i>           | PA14     | 78.0 $\pm$ 2.5                     | 101                    | -8%      | 100/120                           | <0.05                      |                   |

The experiments for the survival data within the solid line were done in parallel. Statistical analysis was done for the data sets within the solid line. Percent (%) changes in mean survival

and  $p$  values of the animals treated with RNAi targeting each of UPR<sup>MT</sup> components were calculated against the animals treated with control RNAi. Percent (%) changes in mean survival and  $p$  values of mutant animals were calculated against wild-type (N2) animals. All the  $p$  values were calculated using the log-rank (Mantel-Cox method) test.

**Appendix Table S5. The effects of *hsp-60* RNAi on the survival of *pmk-1*, *zip-2*, and *daf-16* mutant animals on PA14.**

| Strain /treatment                         | Bacteria | Mean survival $\pm$ s.e.m. (hours) | Hours at 75% mortality | % change | Number of animals that died/total | <i>p</i> value vs. control | Figure in text |
|-------------------------------------------|----------|------------------------------------|------------------------|----------|-----------------------------------|----------------------------|----------------|
| <i>pmk-1(km25)</i> /control RNAi          | PA14     | 51.0 $\pm$ 1.1                     | 65                     |          | 111/120                           |                            | Fig 1B and 4G  |
| <i>pmk-1(km25)</i> / <i>hsp-60</i> RNAi   | PA14     | 50.9 $\pm$ 0.9                     | 65                     | 0%       | 119/120                           | 0.4613                     | Fig 1B and 4G  |
| <i>pmk-1(km25)</i> /control RNAi          | PA14     | 57.3 $\pm$ 1.3                     | 73                     |          | 113/120                           |                            |                |
| <i>pmk-1(km25)</i> / <i>hsp-60</i> RNAi   | PA14     | 49.1 $\pm$ 1.1                     | 65                     | -14%     | 117/120                           | <0.001                     |                |
| <i>pmk-1(km25)</i> /control RNAi          | PA14     | 47.3 $\pm$ 1.6                     | 56                     |          | 120/120                           |                            | Fig 1B         |
| <i>pmk-1(km25)</i> / <i>hsp-60</i> RNAi   | PA14     | 61.0 $\pm$ 1.4                     | 73                     | 29%      | 120/120                           | <0.001                     | Fig 1B         |
| <i>zip-2(tm4067)</i> /control RNAi        | PA14     | 91.1 $\pm$ 2.4                     | 100                    |          | 77/90                             |                            | Fig 1B and 4H  |
| <i>zip-2(tm4067)</i> / <i>hsp-60</i> RNAi | PA14     | 64.3 $\pm$ 0.8                     | 72                     | -30%     | 114/120                           | <0.001                     | Fig 1B and 4H  |
| <i>zip-2(tm4067)</i> /control RNAi        | PA14     | 88.2 $\pm$ 1.9                     | 93                     |          | 115/120                           |                            | Fig 1B         |
| <i>zip-2(tm4067)</i> / <i>hsp-60</i> RNAi | PA14     | 75.5 $\pm$ 1.0                     | 82                     | -15%     | 113/120                           | <0.001                     | Fig 1B         |
| <i>zip-2(tm4067)</i> /control RNAi        | PA14     | 103.2 $\pm$ 2.1                    | 119                    |          | 117/120                           |                            |                |
| <i>zip-2(tm4067)</i> / <i>hsp-60</i> RNAi | PA14     | 49.8 $\pm$ 1.9                     | 65                     | -52%     | 113/120                           | <0.001                     |                |
| <i>daf-16(mu86)</i> /control RNAi         | PA14     | 104.8 $\pm$ 1.7                    | 113                    |          | 117/120                           |                            | Fig 1B and 4I  |
| <i>daf-16(mu86)</i> / <i>hsp-60</i> RNAi  | PA14     | 75.8 $\pm$ 1.2                     | 93                     | -28%     | 112/120                           | <0.001                     | Fig 1B and 4I  |
| <i>daf-16(mu86)</i> /control RNAi         | PA14     | 96.1 $\pm$ 2.4                     | 111                    |          | 112/120                           |                            | Fig 1B         |
| <i>daf-16(mu86)</i> / <i>hsp-60</i> RNAi  | PA14     | 77.1 $\pm$ 1.7                     | 88                     | -20%     | 87/120                            | <0.001                     | Fig 1B         |

The experiments for the survival data within the solid line were done in parallel. Statistical analysis was done for the data sets within the solid line. Percent (%) changes in mean survival and  $p$  values of the animals treated with *hsp-60* RNAi were calculated against the animals treated with control RNAi. All the  $p$  values were calculated using the log-rank (Mantel-Cox) test.



**Appendix Table S6. The effects of *hsp-60* RNAi on the survival of *tir-1* gain-of-function (*gf*) mutant animals on PA14.**

| Strain /treatment                         | Bacteria | Mean survival $\pm$ s.e.m. (hours) | Hours at 75% mortality | % change                                 | Number of animals that died/total | <i>p</i> value vs. control                    | Figure in text |
|-------------------------------------------|----------|------------------------------------|------------------------|------------------------------------------|-----------------------------------|-----------------------------------------------|----------------|
| Wild-type /control RNAi                   | PA14     | 120.1 $\pm$ 2.2                    | 130                    |                                          | 116/120                           |                                               | Fig 5C         |
| Wild-type / <i>hsp-60</i> RNAi            | PA14     | 73.5 $\pm$ 1.2                     | 83                     | -39%                                     | 115/120                           | <0.001                                        | Fig 5C         |
| <i>tir-1(yz68gf)</i> /control RNAi        | PA14     | 138.5 $\pm$ 3.3                    | 157                    | 15%                                      | 100/120                           | <0.001                                        | Fig 5C         |
| <i>tir-1(yz68gf)</i> / <i>hsp-60</i> RNAi | PA14     | 81.9 $\pm$ 1.0                     | 101                    | -41%<br>(12% <sup><i>hsp-60i</i></sup> ) | 91/120                            | <0.001<br>(<0.001 <sup><i>hsp-60i</i></sup> ) | Fig 5C         |
| Wild-type /control RNAi                   | PA14     | 101.6 $\pm$ 2.4                    | 115                    |                                          | 82/90                             |                                               |                |
| Wild-type / <i>hsp-60</i> RNAi            | PA14     | 91.5 $\pm$ 1.5                     | 105                    | -10%                                     | 86/90                             | <0.001                                        |                |
| <i>tir-1(yz68gf)</i> /control RNAi        | PA14     | 126.0 $\pm$ 2.6                    | 152                    | 24%                                      | 76/90                             | <0.001                                        |                |
| <i>tir-1(yz68gf)</i> / <i>hsp-60</i> RNAi | PA14     | 83.8 $\pm$ 1.4                     | 92                     | -34%<br>(-8% <sup><i>hsp-60i</i></sup> ) | 84/90                             | <0.001<br>(<0.001 <sup><i>hsp-60i</i></sup> ) |                |

The experiments for the survival data within the solid line were done in parallel. Statistical analysis was done for the data sets within the solid line. Percent (%) changes in mean survival and *p* values of the animals treated with *hsp-60* RNAi were calculated against the animals treated with control RNAi. Percent (%) changes in mean survival and *p* values of *tir-1(gf)* animals treated with *hsp-60* RNAi were obtained against *tir-1(gf)* animals treated with control RNAi. *p* values in parentheses were calculated against wild-type animals treated with *hsp-60* RNAi (<sup>*hsp-60i*</sup>), and %<sup>*hsp-60i*</sup> indicates percent (%) changes in mean survival compared to wild-type animals treated with *hsp-60* RNAi. All the *p* values were calculated using the log-rank (Mantel-Cox) test.

Appendix Table S7. The effects of *hsp-60::GFP* on the survival of *C. elegans* on PA14.

| Strain /treatment                           | Bacteria | Mean survival $\pm$ s.e.m. (hours) | Hours at 75% mortality | % change | Number of animals that died/total | <i>p</i> value vs. control | Figure in text |
|---------------------------------------------|----------|------------------------------------|------------------------|----------|-----------------------------------|----------------------------|----------------|
| Wild-type                                   | PA14     | 119.1 $\pm$ 2.4                    | 130                    |          | 84/90                             |                            | Fig 6G         |
| <i>hsp-60p::hsp-60::GFP; odr-1p::RFP #1</i> | PA14     | 183.9 $\pm$ 5.5                    | 224                    | 54%      | 77/90                             | <0.001                     | Fig 6G         |
| <i>hsp-60p::hsp-60::GFP; odr-1p::RFP #2</i> | PA14     | 174.2 $\pm$ 5.8                    | 211                    | 46%      | 73/90                             | <0.001                     | Fig 6G         |
| Wild-type                                   | PA14     | 121.5 $\pm$ 3.0                    | 145                    |          | 77/90                             |                            |                |
| <i>hsp-60p::hsp-60::GFP; odr-1p::RFP #1</i> | PA14     | 196.9 $\pm$ 8.2                    | 254                    | 62%      | 78/90                             | <0.001                     |                |
| <i>hsp-60p::hsp-60::GFP; odr-1p::RFP #2</i> | PA14     | 161.2 $\pm$ 6.4                    | 194                    | 33%      | 78/89                             | <0.001                     |                |
| <i>odr-1p::RFP</i>                          | PA14     | 122.1 $\pm$ 2.0                    | 134                    |          | 111/120                           |                            | Fig EV3E       |
| <i>hsp-60p::hsp-60::GFP; odr-1p::RFP #3</i> | PA14     | 184.9 $\pm$ 8.4                    | 227                    | 51%      | 41/50                             | <0.001                     | Fig EV3E       |
| <i>hsp-60p::hsp-60::GFP; odr-1p::RFP #4</i> | PA14     | 137.5 $\pm$ 3.7                    | 155                    | 13%      | 116/120                           | <0.001                     | Fig EV3E       |
| <i>hsp-60p::hsp-60::GFP; odr-1p::RFP #5</i> | PA14     | 147.1 $\pm$ 4.6                    | 167                    | 21%      | 79/90                             | <0.001                     | Fig EV3E       |
| <i>odr-1p::RFP</i>                          | PA14     | 92.6 $\pm$ 2.7                     | 112                    |          | 114/120                           |                            |                |
| <i>hsp-60p::hsp-60::GFP; odr-1p::RFP #3</i> | PA14     | 156.8 $\pm$ 5.4                    | 195                    | 69%      | 74/90                             | <0.001                     |                |
| <i>hsp-60p::hsp-60::GFP; odr-1p::RFP #4</i> | PA14     | 109.7 $\pm$ 5.4                    | 122                    | 18%      | 49/50                             | 0.0034                     |                |

|                                                                  |      |           |     |                                         |       |                                               |          |
|------------------------------------------------------------------|------|-----------|-----|-----------------------------------------|-------|-----------------------------------------------|----------|
| <i>hsp-60p::hsp-60::GFP; odr-1p::RFP #5</i>                      | PA14 | 120.7±9.1 | 145 | 30%                                     | 23/25 | <0.001                                        |          |
| Wild-type /control RNAi                                          | PA14 | 135.3±4.1 | 165 |                                         | 85/90 |                                               | Fig 6H   |
| Wild-type / <i>hsp-60</i> RNAi                                   | PA14 | 74.4±1.7  | 92  | -45%                                    | 88/90 | <0.001                                        | Fig 6H   |
| <i>hsp-60p::hsp-60::GFP; odr-1p::RFP #1</i> /control RNAi        | PA14 | 208.5±7.9 | 262 | 54%                                     | 71/90 | <0.001                                        | Fig 6H   |
| <i>hsp-60p::hsp-60::GFP #1</i> / <i>hsp-60</i> RNAi              | PA14 | 78.5±2.4  | 92  | -62%<br>(5% <sup><i>hsp-60i</i></sup> ) | 86/90 | <0.001<br>(0.0221 <sup><i>hsp-60i</i></sup> ) | Fig 6H   |
| Wild-type /control RNAi                                          | PA14 | 101.7±2.9 | 120 |                                         | 78/90 |                                               |          |
| Wild-type / <i>hsp-60</i> RNAi                                   | PA14 | 78.4±1.3  | 95  | -23%                                    | 85/90 | <0.001                                        |          |
| <i>hsp-60p::hsp-60::GFP; odr-1p::RFP #1</i> /control RNAi        | PA14 | 152.8±4.6 | 191 | 50%                                     | 80/89 | <0.001                                        |          |
| <i>hsp-60p::hsp-60::GFP; odr-1p::RFP #1</i> / <i>hsp-60</i> RNAi | PA14 | 82.1±2.5  | 95  | -46%<br>(5% <sup><i>hsp-60i</i></sup> ) | 55/60 | <0.001<br>(0.0464 <sup><i>hsp-60i</i></sup> ) |          |
| Day 6 wild-type                                                  | PA14 | 66.4±4.0  | 81  |                                         | 79/89 |                                               | Fig 6J   |
| Day 6 <i>hsp-60p::hsp-60::GFP; odr-1p::RFP #1</i>                | PA14 | 115.4±7.0 | 152 | 74%                                     | 76/90 | <0.001                                        | Fig 6J   |
| Day 6 wild-type                                                  | PA14 | 76.6±4.7  | 104 |                                         | 77/90 |                                               |          |
| Day 6 <i>hsp-60p::hsp-60::GFP; odr-1p::RFP #1</i>                | PA14 | 96.5±6.7  | 143 | 26%                                     | 74/90 | 0.0108                                        |          |
| <i>fasn-1p::GFP</i>                                              | PA14 | 91.7±2.5  | 106 |                                         | 85/90 |                                               | Fig EV3F |
| <i>hsp-60p::hsp-60; fasn-1p::GFP #1</i>                          | PA14 | 102.4±2.9 | 129 | 12%                                     | 82/90 | <0.01                                         | Fig EV3F |

|                                         |      |           |     |     |       |        |          |
|-----------------------------------------|------|-----------|-----|-----|-------|--------|----------|
| <i>hsp-60p::hsp-60; fasn-1p::GFP #2</i> | PA14 | 113.0±3.0 | 129 | 23% | 74/90 | <0.001 | Fig EV3F |
| <i>fasn-1p::GFP</i>                     | PA14 | 107.6±2.5 | 122 |     | 81/90 |        |          |
| <i>hsp-60p::hsp-60; fasn-1p::GFP #1</i> | PA14 | 117.7±3.4 | 136 | 9%  | 78/90 | <0.01  |          |
| <i>hsp-60p::hsp-60; fasn-1p::GFP #2</i> | PA14 | 122.7±3.3 | 147 | 14% | 78/90 | <0.001 |          |

The experiments for the survival data within the solid line were done in parallel. Statistical analysis was done for the data sets within the solid line. Percent (%) changes in mean survival and *p* values of transgenic animals were calculated against control animals. Percent (%) changes in mean survival and *p* values of *hsp-60p::hsp-60::GFP* animals treated with *hsp-60* RNAi were obtained against *hsp-60p::hsp-60::GFP* animals treated with control RNAi. All the *p* values were calculated using the log-rank (Mantel-Cox method) test.

**Appendix Table S8. The effects of transgenic expression of *hsp-60::GFP* on the lifespan of wild-type *C. elegans*.**

| Strain /treatment                           | Bacteria              | Mean lifespan $\pm$ s.e.m. (days) | Days at 75% mortality | % change | Number of animals that died/total | <i>p</i> value vs. control | Figure in text |
|---------------------------------------------|-----------------------|-----------------------------------|-----------------------|----------|-----------------------------------|----------------------------|----------------|
| Wild-type                                   | <i>E. coli</i> (OP50) | 18.7 $\pm$ 0.4                    | 22                    |          | 101/120                           |                            | Fig 6I         |
| <i>hsp-60p::hsp-60::GFP; odr-1p::RFP #1</i> | <i>E. coli</i> (OP50) | 19.3 $\pm$ 0.6                    | 24                    | 3%       | 82/120                            | 0.1292                     | Fig 6I         |
| <i>hsp-60p::hsp-60::GFP; odr-1p::RFP #2</i> | <i>E. coli</i> (OP50) | 16.9 $\pm$ 0.4                    | 19                    | -10%     | 80/120                            | 0.0024                     | Fig 6I         |
| Wild-type                                   | <i>E. coli</i> (OP50) | 19.9 $\pm$ 0.4                    | 23                    |          | 108/120                           |                            |                |
| <i>hsp-60p::hsp-60::GFP; odr-1p::RFP #1</i> | <i>E. coli</i> (OP50) | 19.2 $\pm$ 0.6                    | 23                    | -4%      | 73/120                            | 0.8126                     |                |
| <i>hsp-60p::hsp-60::GFP; odr-1p::RFP #2</i> | <i>E. coli</i> (OP50) | 18.2 $\pm$ 0.5                    | 21                    | -9%      | 74/90                             | 0.0400                     |                |
| <i>odr-1p::RFP</i>                          | <i>E. coli</i> (OP50) | 18.7 $\pm$ 0.4                    | 23                    |          | 105/120                           |                            | Fig EV3G       |
| <i>hsp-60p::hsp-60::GFP; odr-1p::RFP #3</i> | <i>E. coli</i> (OP50) | 16.9 $\pm$ 0.5                    | 21                    | -10%     | 78/120                            | <0.001                     | Fig EV3G       |
| <i>odr-1p::RFP</i>                          | <i>E. coli</i> (OP50) | 17.8 $\pm$ 0.5                    | 21                    |          | 71/90                             |                            |                |
| <i>hsp-60p::hsp-60::GFP; odr-1p::RFP #3</i> | <i>E. coli</i> (OP50) | 16.3 $\pm$ 0.6                    | 21                    | -8%      | 71/90                             | 0.2187                     |                |

The experiments for the survival data within the solid line were done in parallel. Statistical analysis was done for the data sets within the solid line. Percent (%) changes in mean lifespan and *p* values of transgenic animals that express *hsp-60p::hsp-60::GFP* were calculated against control animals. All the *p* values were calculated using the log-rank (Mantel-Cox method) test.

**Appendix Table S9. The effects of transgenic expression of mitochondrial GFP (*GFP<sup>MT</sup>*) on the survival of *C. elegans* on PA14.**

| Strain /treatment                                | Bacteria | Mean survival $\pm$ s.e.m. (hours) | Hours at 75% mortality | % change | Number of animals that died/total | <i>p</i> value vs. control | Figure in text |
|--------------------------------------------------|----------|------------------------------------|------------------------|----------|-----------------------------------|----------------------------|----------------|
| <i>odr-1p::RFP</i>                               | PA14     | 100.0 $\pm$ 2.4                    | 116                    |          | 81/90                             |                            | AF<br>S3D      |
| <i>hsp-60p::GFP<sup>MT</sup>; odr-1p::RFP #1</i> | PA14     | 96.7 $\pm$ 2.2                     | 116                    | -3%      | 80/90                             | 0.3508                     | AF<br>S3D      |
| <i>hsp-60p::GFP<sup>MT</sup>; odr-1p::RFP #2</i> | PA14     | 98.8 $\pm$ 2.4                     | 116                    | -1%      | 81/90                             | 0.7841                     | AF<br>S3D      |
| <i>hsp-60p::GFP<sup>MT</sup>; odr-1p::RFP #3</i> | PA14     | 105.0 $\pm$ 2.5                    | 116                    | 5%       | 79/90                             | 0.1346                     | AF<br>S3D      |
| <i>hsp-60p::hsp-60::GFP; odr-1p::RFP #1</i>      | PA14     | 155.1 $\pm$ 6.2                    | 213                    | 55%      | 60/90                             | <0.001                     | AF<br>S3D      |
| <i>odr-1p::RFP</i>                               | PA14     | 95.0 $\pm$ 2.6                     | 115                    |          | 85/90                             |                            |                |
| <i>hsp-60p::GFP<sup>MT</sup>; odr-1p::RFP #1</i> | PA14     | 101.4 $\pm$ 2.4                    | 115                    | 7%       | 84/90                             | 0.1693                     |                |
| <i>hsp-60p::GFP<sup>MT</sup>; odr-1p::RFP #2</i> | PA14     | 90.3 $\pm$ 2.3                     | 115                    | -5%      | 87/90                             | 0.1171                     |                |
| <i>hsp-60p::GFP<sup>MT</sup>; odr-1p::RFP #3</i> | PA14     | 97.0 $\pm$ 2.9                     | 115                    | 2%       | 85/90                             | 0.5348                     |                |
| <i>hsp-60p::hsp-60::GFP; odr-1p::RFP #1</i>      | PA14     | 118.0 $\pm$ 4.9                    | 134                    | 24%      | 82/90                             | <0.001                     |                |

The experiments for the survival data within the solid line were done in parallel. Statistical analysis was done for the data sets within the solid line. Percent (%) changes in mean survival

and  $p$  values of transgenic animals were calculated against control animals. All the  $p$  values were calculated using the log-rank (Mantel-Cox method) test. AF indicates Appendix Figure.

**Appendix Table S10. The effects of transgenic expression of *hsp-60::GFP* on the survival of *pmk-1*, *sek-1*, *nsy-1*, and *tir-1* mutant animals on PA14.**

| Strain /treatment                                        | Bacteria | Mean survival $\pm$ s.e.m. (hours) | Hours at 75% mortality | % change                               | Number of animals that died/total | <i>p</i> value vs. control                  | Figure in text |
|----------------------------------------------------------|----------|------------------------------------|------------------------|----------------------------------------|-----------------------------------|---------------------------------------------|----------------|
| Wild-type                                                | PA14     | 121.7 $\pm$ 2.5                    | 139                    |                                        | 89/90                             |                                             | Fig 7F         |
| <i>pmk-1(km25)</i>                                       | PA14     | 54.1 $\pm$ 0.7                     | 68                     | -56%                                   | 87/90                             | <0.001                                      | Fig 7F         |
| <i>hsp-60p::hsp-60::GFP; odr-1p::RFP #1</i>              | PA14     | 190.2 $\pm$ 5.1                    | 222                    | 56%                                    | 61/88                             | <0.001                                      | Fig 7F         |
| <i>pmk-1(km25); hsp-60p::hsp-60::GFP; odr-1p::RFP #1</i> | PA14     | 67.0 $\pm$ 1.9                     | 80                     | -65%<br>(24% <sup><i>pmk-1</i></sup> ) | 89/90                             | <0.001<br>(<0.001 <sup><i>pmk-1</i></sup> ) | Fig 7F         |
| Wild-type                                                | PA14     | 133.7 $\pm$ 3.8                    | 153                    |                                        | 81/90                             |                                             |                |
| <i>pmk-1(km25)</i>                                       | PA14     | 59.9 $\pm$ 1.2                     | 68                     | -55%                                   | 90/90                             | <0.001                                      |                |
| <i>hsp-60p::hsp-60::GFP; odr-1p::RFP #1</i>              | PA14     | 187.1 $\pm$ 7.4                    | 237                    | 40%                                    | 58/81                             | <0.001                                      |                |
| <i>pmk-1(km25); hsp-60p::hsp-60::GFP; odr-1p::RFP #1</i> | PA14     | 77.9 $\pm$ 2.2                     | 91                     | -58%<br>(30% <sup><i>pmk-1</i></sup> ) | 85/90                             | <0.001<br>(<0.001 <sup><i>pmk-1</i></sup> ) |                |
| Wild-type                                                | PA14     | 126.9 $\pm$ 2.5                    | 140                    |                                        | 84/90                             |                                             | Fig 7G         |
| <i>sek-1(km4)</i>                                        | PA14     | 41.1 $\pm$ 0.9                     | 54                     | -68%                                   | 89/90                             | <0.001                                      | Fig 7G         |
| <i>hsp-60p::hsp-60::GFP; odr-1p::RFP #1</i>              | PA14     | 174.6 $\pm$ 5.9                    | 212                    | 38%                                    | 77/90                             | <0.001                                      | Fig 7G         |
| <i>sek-1(km4); hsp-60p::hsp-60::GFP; odr-1p::RFP #1</i>  | PA14     | 46.9 $\pm$ 1.6                     | 68                     | -73%<br>(14% <sup><i>sek-1</i></sup> ) | 90/90                             | <0.001                                      | Fig 7G         |



|                                                           |      |           |     |                                         |       |                                             |        |
|-----------------------------------------------------------|------|-----------|-----|-----------------------------------------|-------|---------------------------------------------|--------|
| Wild-type                                                 | PA14 | 144.9±2.5 | 165 |                                         | 80/90 |                                             |        |
| <i>sek-1(km4)</i>                                         | PA14 | 17.6±2.0  | 54  | -88%                                    | 90/90 | <0.001                                      |        |
| <i>hsp-60p::hsp-60::GFP; odr-1p::RFP #1</i>               | PA14 | 187.3±8.1 | 214 | 29%                                     | 44/90 | <0.001                                      |        |
| <i>sek-1(km4); hsp-60p::hsp-60::GFP; odr-1p::RFP #1</i>   | PA14 | 33.0±2.5  | 54  | -82%<br>(88% <sup><i>sek-1</i></sup> )  | 90/90 | <0.001<br>(<0.001 <sup><i>sek-1</i></sup> ) |        |
| Wild-type                                                 | PA14 | 128.9±3.5 | 143 |                                         | 83/90 |                                             | Fig 7H |
| <i>nsy-1(ok293)</i>                                       | PA14 | 68.4±2.1  | 84  | -47%                                    | 85/90 | <0.001                                      | Fig 7H |
| <i>hsp-60p::hsp-60::GFP; odr-1p::RFP #1</i>               | PA14 | 162.3±8.3 | 229 | 26%                                     | 61/90 | <0.001                                      | Fig 7H |
| <i>nsy-1(ok293); hsp-60p::hsp-60::GFP; odr-1p::RFP #1</i> | PA14 | 110.4±4.5 | 133 | -32%<br>(61% <sup><i>nsy-1</i></sup> )  | 68/90 | <0.001<br>(<0.001 <sup><i>nsy-1</i></sup> ) | Fig 7H |
| Wild-type                                                 | PA14 | 139.5±3.0 | 156 |                                         | 83/90 |                                             |        |
| <i>nsy-1(ok293)</i>                                       | PA14 | 75.1±1.9  | 108 | -46%                                    | 85/90 | <0.001                                      |        |
| <i>hsp-60p::hsp-60::GFP; odr-1p::RFP #1</i>               | PA14 | 172.1±6.5 | 252 | 23%                                     | 73/90 | <0.001                                      |        |
| <i>nsy-1(ok293); hsp-60p::hsp-60::GFP; odr-1p::RFP #1</i> | PA14 | 108.7±3.7 | 134 | -37%<br>(45% <sup><i>nsy-1</i></sup> )  | 81/90 | <0.001<br>(<0.001 <sup><i>nsy-1</i></sup> ) |        |
| Wild-type                                                 | PA14 | 120.0±2.1 | 129 |                                         | 88/90 |                                             | Fig 7I |
| <i>tir-1(tm3036)</i>                                      | PA14 | 61.2±1.6  | 77  | -49%                                    | 88/90 | <0.001                                      | Fig 7I |
| <i>hsp-60p::hsp-60::GFP; odr-1p::RFP</i>                  | PA14 | 204.9±7.6 | 284 | 71%                                     | 67/85 | <0.001                                      | Fig 7I |
| <i>tir-1(tm3036); hsp-60p::hsp-60::GFP; odr-1p::RFP</i>   | PA14 | 126.9±5.0 | 176 | -38%<br>(107% <sup><i>tir-1</i></sup> ) | 50/90 | <0.001<br>(<0.001 <sup><i>tir-1</i></sup> ) | Fig 7I |

|                                                         |      |           |     |                                        |       |                                             |  |
|---------------------------------------------------------|------|-----------|-----|----------------------------------------|-------|---------------------------------------------|--|
| Wild-type                                               | PA14 | 108.1±2.0 | 119 |                                        | 85/90 |                                             |  |
| <i>tir-1(tm3036)</i>                                    | PA14 | 48.8±0.7  | 57  | -55%                                   | 90/90 | <0.001                                      |  |
| <i>hsp-60p::hsp-60::GFP; odr-1p::RFP</i>                | PA14 | 178.1±4.8 | 201 | 65%                                    | 84/90 | <0.001                                      |  |
| <i>tir-1(tm3036); hsp-60p::hsp-60::GFP; odr-1p::RFP</i> | PA14 | 97.4±4.0  | 106 | -45%<br>(83% <sup><i>tir-1</i></sup> ) | 81/90 | <0.001<br>(<0.001 <sup><i>tir-1</i></sup> ) |  |

The experiments for the survival data within the solid line were done in parallel. Statistical analysis was done for the data sets within the solid line. Percent (%) changes in mean survival and *p* values of transgenic animals were calculated against control animals. Percent (%) changes in mean survival and *p* values of *pmk-1*, *sek-1*, *nsy-1*, or *tir-1* mutants that expressed *hsp-60p::hsp-60::GFP* were obtained against wild-type that expressed *hsp-60p::hsp-60::GFP*. *p* values in parentheses were calculated against wild-type animals treated with *hsp-60* RNAi (<sup>*hsp-60i*</sup>), or *pmk-1* (<sup>*pmk-1*</sup>), *sek-1* (<sup>*sek-1*</sup>), *nsy-1* (<sup>*nsy-1*</sup>) or *tir-1* (<sup>*tir-1*</sup>) mutant animals. %<sup>*pmk-1*</sup>, %<sup>*sek-1*</sup>, %<sup>*nsy-1*</sup> and %<sup>*tir-1*</sup> indicate percent (%) changes in mean survival compared to *pmk-1*, *sek-1*, *nsy-1* and *tir-1* mutants, respectively. All the *p* values were calculated using the log-rank (Mantel-Cox method) test.

**Appendix Table S11. The effects of transgenic expression of cytosol-specific *hsp-60::GFP* (*cythsp-60::GFP*) on survival upon PA14 infection.**

| Strain /treatment                              | Bacteria | Mean survival $\pm$ s.e.m. (hours) | Hours at 75% mortality | % change | Number of animals that died/total | <i>p</i> value vs. control | Figure in text |
|------------------------------------------------|----------|------------------------------------|------------------------|----------|-----------------------------------|----------------------------|----------------|
| <i>odr-1p::RFP</i>                             | PA14     | 95.9 $\pm$ 2.4                     | 113                    |          | 78/90                             |                            | Fig 9F         |
| <i>hsp-60p::hsp-60::GFP; odr-1p::RFP #1</i>    | PA14     | 134.6 $\pm$ 6.3                    | 182                    | 41%      | 74/90                             | <0.001                     | Fig 9F         |
| <i>hsp-60p::cythsp-60::GFP; odr-1p::RFP #1</i> | PA14     | 144.8 $\pm$ 5.8                    | 169                    | 51%      | 76/90                             | <0.001                     | Fig 9F         |
| <i>hsp-60p::cythsp-60::GFP; odr-1p::RFP #2</i> | PA14     | 124.4 $\pm$ 4.7                    | 161                    | 30%      | 70/90                             | <0.001                     | Fig 9F         |
| <i>hsp-60p::cythsp-60::GFP; odr-1p::RFP #3</i> | PA14     | 131.3 $\pm$ 5.0                    | 145                    | 37%      | 68/90                             | <0.001                     | Fig 9F         |
| <i>odr-1p::RFP</i>                             | PA14     | 87.7 $\pm$ 2.4                     | 97                     |          | 83/90                             |                            |                |
| <i>hsp-60p::cythsp-60::GFP; odr-1p::RFP #1</i> | PA14     | 197.0 $\pm$ 6.5                    | 239                    | 125%     | 77/90                             | <0.001                     |                |
| <i>hsp-60p::cythsp-60::GFP; odr-1p::RFP #2</i> | PA14     | 188.7 $\pm$ 6.3                    | 239                    | 115%     | 78/90                             | <0.001                     |                |
| <i>hsp-60p::cythsp-60::GFP; odr-1p::RFP #3</i> | PA14     | 156.1 $\pm$ 4.8                    | 185                    | 78%      | 84/90                             | <0.001                     |                |

The experiments for the survival data within the solid line were done in parallel. Statistical analysis was done for the data sets within the solid line. Percent (%) changes in mean survival and *p* values of transgenic animals were calculated against control animals. All the *p* values were calculated using the log-rank (Mantel-Cox method) test.

## Appendix References

- Ashburner M, Ball CA, Blake JA, Botstein D, Butler H, Cherry JM, Davis AP, Dolinski K, Dwight SS, Eppig JT, Harris MA, Hill DP, Issel-Tarver L, Kasarskis A, Lewis S, Matese JC, Richardson JE, Ringwald M, Rubin GM, Sherlock G (2000) Gene ontology: tool for the unification of biology. The Gene Ontology Consortium. *Nat Genet* **25**: 25-29
- Bennett CF, Vander Wende H, Simko M, Klum S, Barfield S, Choi H, Pineda VV, Kaeberlein M (2014) Activation of the mitochondrial unfolded protein response does not predict longevity in *Caenorhabditis elegans*. *Nat Commun* **5**: 3483
- Chen YC, Wu YT, Wei YH (2015) Depletion of mitoferrins leads to mitochondrial dysfunction and impairment of adipogenic differentiation in 3T3-L1 preadipocytes. *Free Radic Res* **49**: 1285-1295
- Couillault C, Pujol N, Reboul J, Sabatier L, Guichou JF, Kohara Y, Ewbank JJ (2004) TLR-independent control of innate immunity in *Caenorhabditis elegans* by the TIR domain adaptor protein TIR-1, an ortholog of human SARM. *Nat Immunol* **5**: 488-494
- Gene Ontology Consortium (2015) Gene Ontology Consortium: going forward. *Nucleic Acids Res* **43**: D1049-1056
- Houtkooper RH, Mouchiroud L, Ryu D, Moullan N, Katsyuba E, Knott G, Williams RW, Auwerx J (2013) Mitonuclear protein imbalance as a conserved longevity mechanism. *Nature* **497**: 451-7
- Kim DH (2013) Bacteria and the aging and longevity of *Caenorhabditis elegans*. *Annu Rev*

*Genet* **47**: 233-246

Kulawiak B, Hopker J, Gebert M, Guiard B, Wiedemann N, Gebert N (2013) The mitochondrial protein import machinery has multiple connections to the respiratory chain. *Biochim Biophys Acta* **1827**: 612-626

Nargund AM, Pellegrino MW, Fiorese CJ, Baker BM, Haynes CM (2012) Mitochondrial import efficiency of ATFS-1 regulates mitochondrial UPR activation. *Science* **337**: 587-590

Pagliarini DJ, Calvo SE, Chang B, Sheth SA, Vafai SB, Ong SE, Walford GA, Sugiana C, Boneh A, Chen WK, Hill DE, Vidal M, Evans JG, Thorburn DR, Carr SA, Mootha VK (2008) A mitochondrial protein compendium elucidates complex I disease biology. *Cell* **134**: 112-123

Pellegrino MW, Nargund AM, Haynes CM (2013) Signaling the mitochondrial unfolded protein response. *Biochim Biophys Acta* **1833**: 410-416

Pellegrino MW, Nargund AM, Kirienko NV, Gillis R, Fiorese CJ, Haynes CM (2014) Mitochondrial UPR-regulated innate immunity provides resistance to pathogen infection. *Nature* **516**: 414-417

Pujol N, Zugasti O, Wong D, Couillault C, Kurz CL, Schulenburg H, Ewbank JJ (2008) Anti-fungal innate immunity in *C. elegans* is enhanced by evolutionary diversification of antimicrobial peptides. *PLoS Pathog* **4**:e1000105

Rohlfing AK, Miteva Y, Hannenhalli S, Lamitina T (2010) Genetic and physiological activation of osmosensitive gene expression mimics transcriptional signatures of pathogen

infection in *C. elegans*. *PLoS One* **5**(2): e9010

Rohlfing AK, Miteva Y, Moronetti L, He L, Lamitina T (2011) The *Caenorhabditis elegans* mucin-like protein OSM-8 negatively regulates osmosensitive physiology via the transmembrane protein PTR-23. *PLoS Genet* **7**: e1001267

Yoneda T, Benedetti C, Urano F, Clark SG, Harding HP, Ron D (2004) Compartment-specific perturbation of protein handling activates genes encoding mitochondrial chaperones. *J Cell Sci* **117**: 4055-4066

Zugasti O, Thakur N, Belougne J, Squiban B, Kurz L, Soule J, Omi S, Tichit L, Pujol N, Ewbank JJ (2016) A quantitative genome-wide RNAi screen in *C. elegans* for antifungal innate immunity genes. *BMC Biol* **14**:35
