# Supplementary material
Source: PubMed Central journal article supplement (PMC5391144)
Supplement: EMBJ-36-1046-s002.pdf [file EMBJ-36-1046-s002.pdf]

## Expanded View Figures

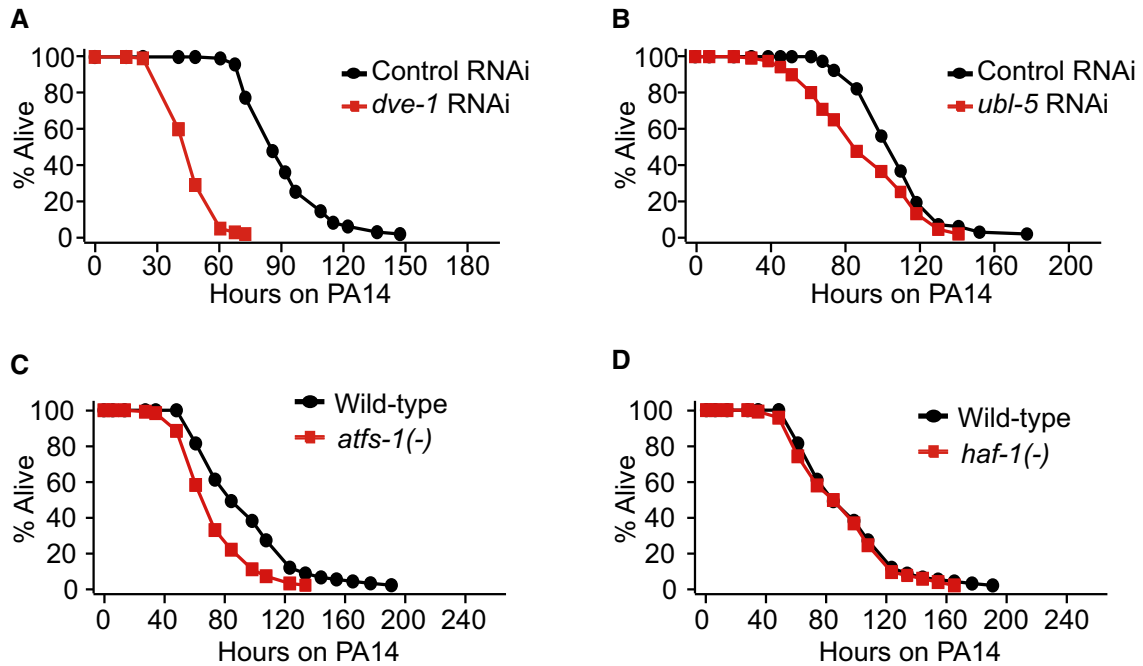

**Figure EV1.** The effects of genetic inhibition of various UPR<sup>MT</sup> components on the survival of animals infected with PA14.

A, B *dve-1* RNAi (A)- or *ubl-5* RNAi (B)-treated animals displayed increased susceptibility to PA14 infection.

C, D *atfs-1(gk3094)* mutant animals (C) displayed increased susceptibility to PA14 infection, whereas *haf-1(ok705)* mutant animals (D) did not.

Data information: See Appendix Table S4 for additional repeats and statistical analysis for survival and lifespan data shown in this figure.

**Figure EV2.** The effects of genetic inhibition of various UPR<sup>MT</sup> components on the expression of PMK-1 target genes.

A Upon PA14 infection, RNAi knockdown of *dve-1* or *ubl-5* decreased the expression of *T24B8.5p::GFP*, a downstream reporter of PMK-1.

B Quantification of data in panel (A) ( $n \geq 23$  from three independent experiments). The data for control RNAi and *pmk-1* RNAi are the same as the ones shown in Fig 4B and shown here for comparison.

C *hsp-60* RNAi decreased the elevated level of *F35E12.5p::GFP*, a downstream reporter of PMK-1 upon PA14 infection.

D Quantification of data in panel (C) ( $n \geq 20$  from three independent experiments).

E Mutations in *atfs-1* or *haf-1* did not affect the level of *T24B8.5p::GFP* on PA14, but *atfs-1* mutations induced *T24B8.5p::GFP* without PA14 infection.

F Quantification of data in panel (E) ( $n \geq 25$  from three independent experiments).

G Quantification of Western blot data in Fig 4F ( $n \geq 4$ ).

Data information: *pmk-1* RNAi (A–D) or mutation (E, F) was used as a positive control. Scale bars indicate 200  $\mu$ m. Error bars represent SEM. Two-tailed Student's *t*-test was used for calculating *P*-values (\* $P < 0.05$ , \*\* $P < 0.01$ , \*\*\* $P < 0.001$ ).

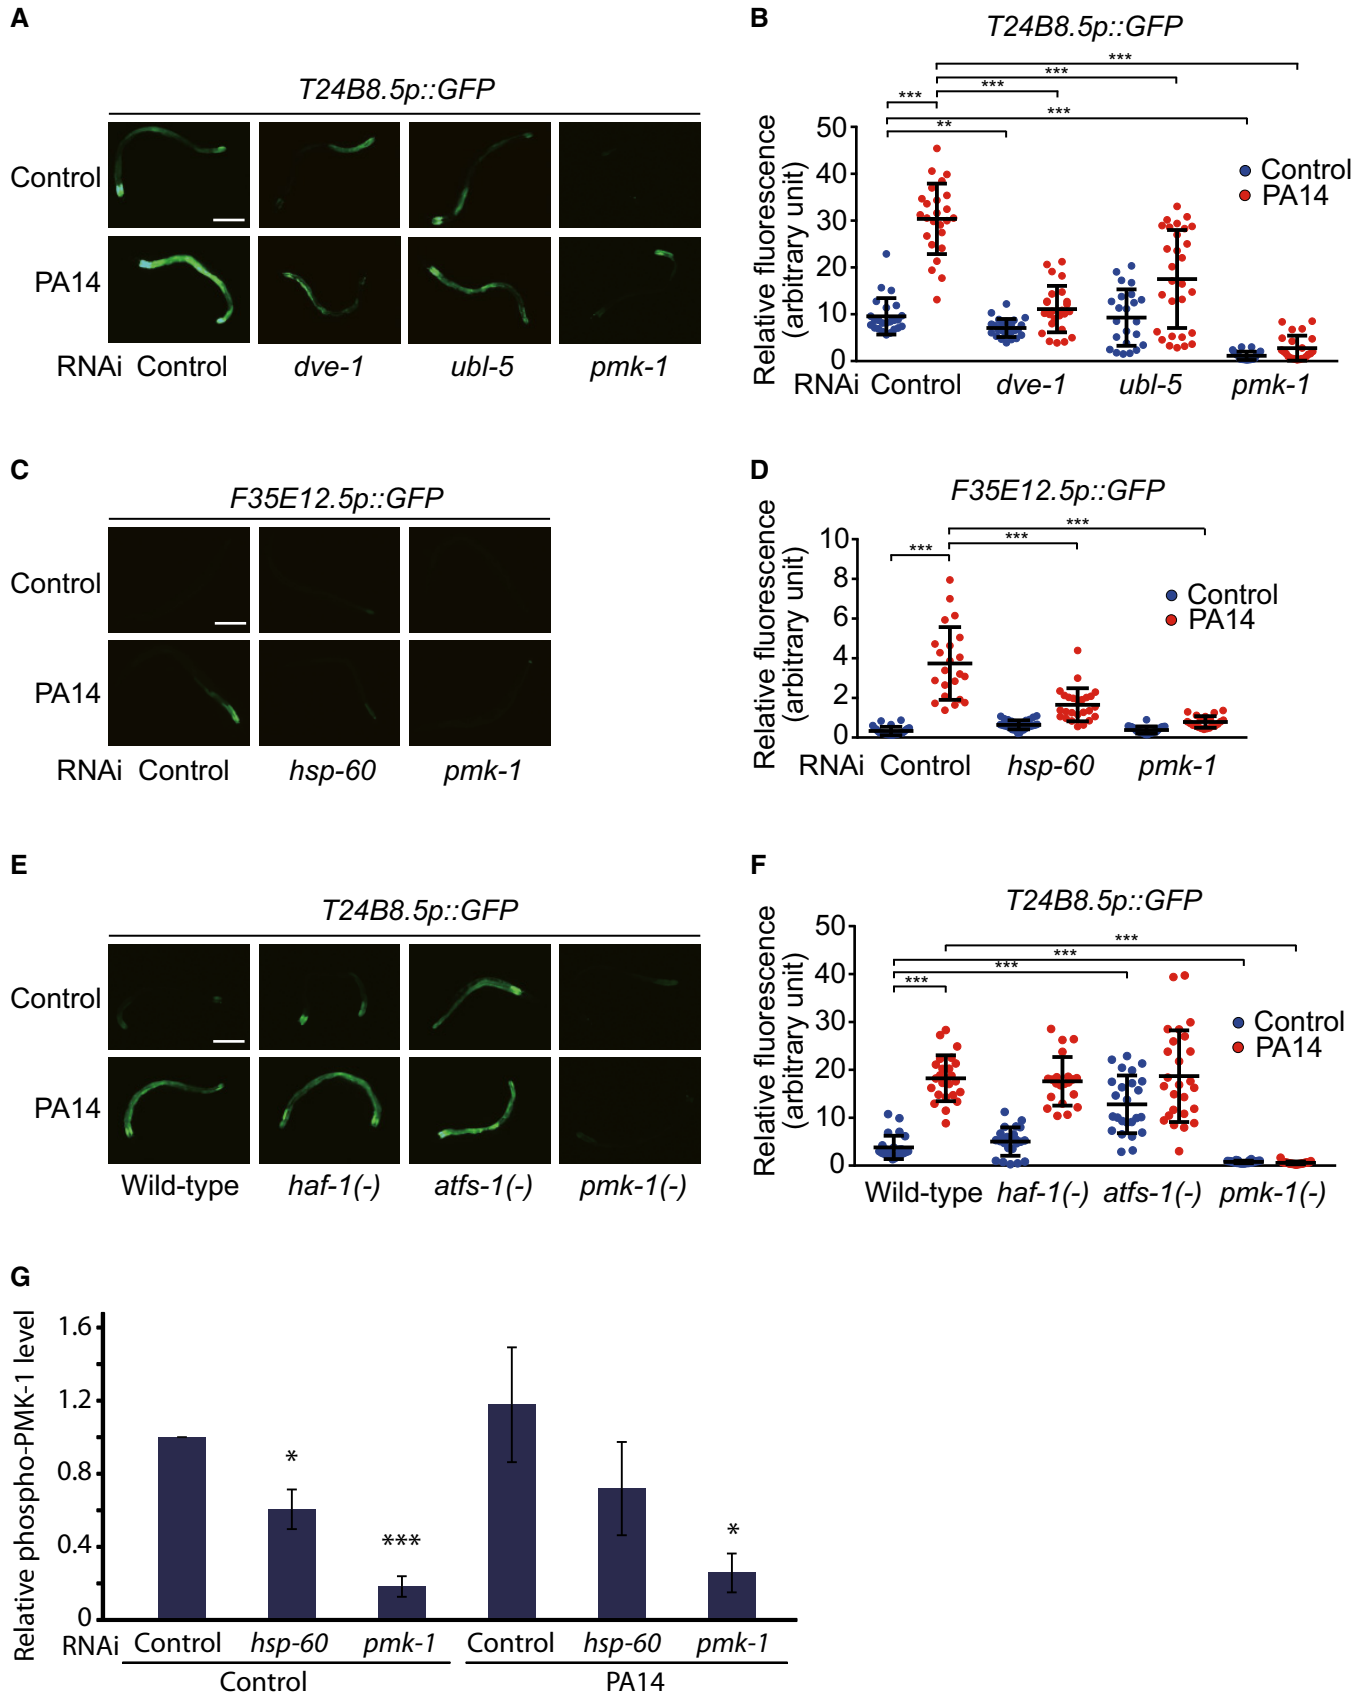

Figure EV2.

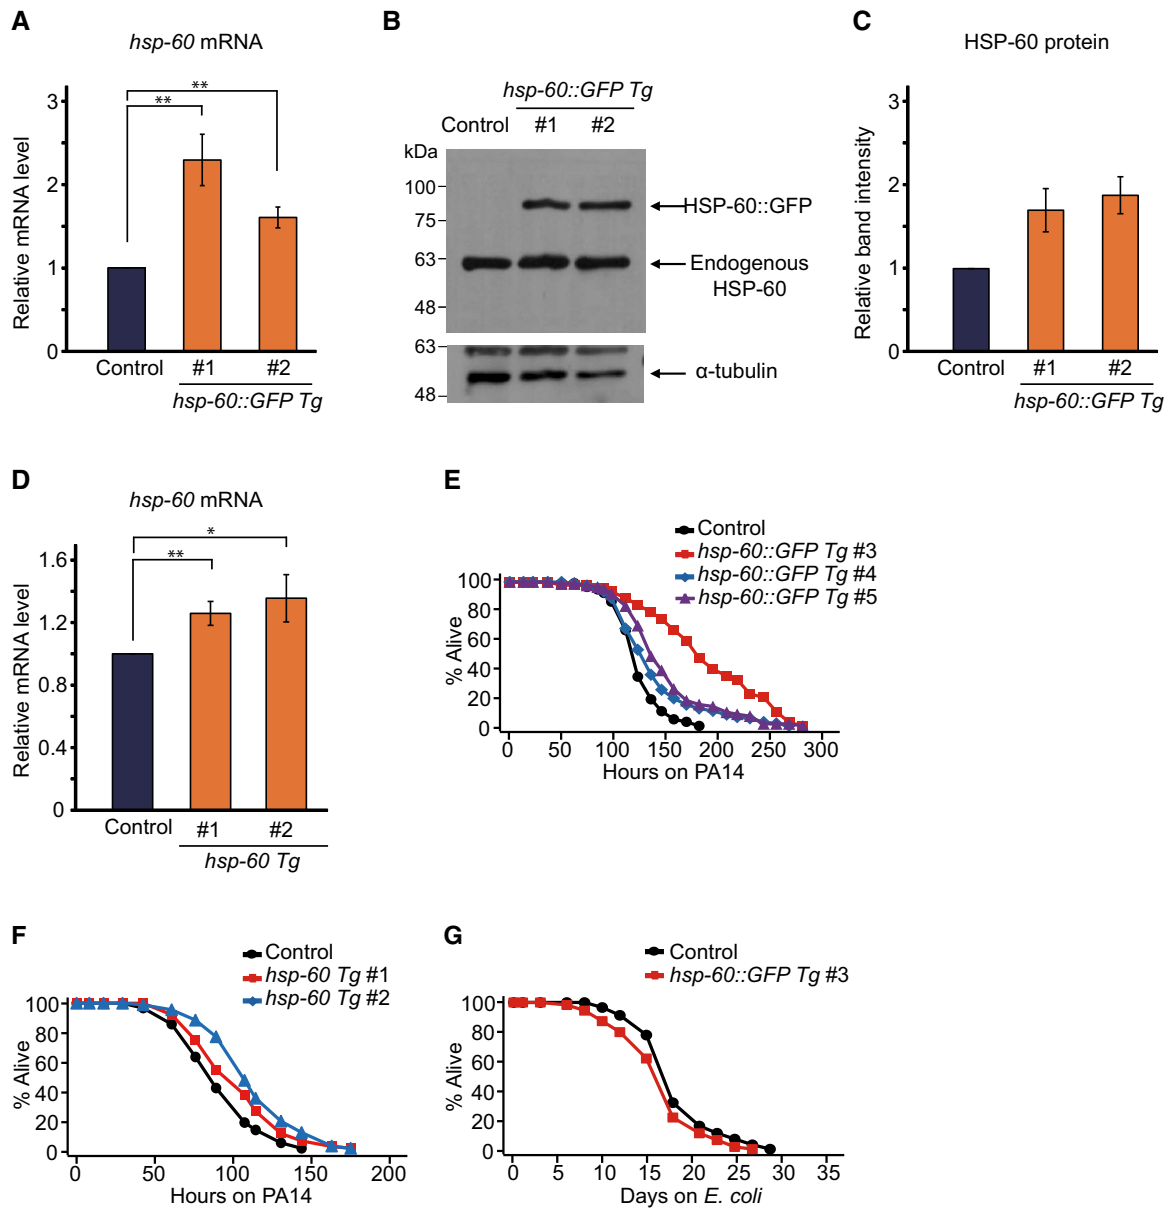

**Figure EV3. *hsp-60::GFP* expression increases the survival of animals infected with PA14, while not extending lifespan.**

- A qRT-PCR results indicate that transgenic *hsp-60::GFP* expression (*hsp-60::GFP Tg*) increased the level of *hsp-60* mRNA in the two independent transgenic animals.
- B, C Western blot data show the levels of both endogenous HSP-60 and GFP-fused HSP-60 in two independent transgenic lines (B). HSP-60 antibody was used for the detection of both endogenous and GFP-fused HSP-60. Total HSP-60 protein levels were quantified by adding band intensities of endogenous HSP-60 and GFP-fused HSP-60 ( $n = 2$ ) (C).
- D qRT-PCR data indicate that transgenic expression of *hsp-60* without a tag (*hsp-60 Tg*) slightly but significantly increased the level of *hsp-60* mRNA in two independent lines of transgenic animals (#1 and #2; see Materials and Methods).
- E Three independent lines (#3, #4, and #5; see Materials and Methods) of transgenic animals that carried extrachromosomal arrays of *hsp-60::GFP* (*hsp-60::GFP Tg*) displayed significant increases in resistance to PA14 ( $P < 0.001$ ). We noticed that the effects of *hsp-60::GFP Tg* #4 and #5 on the survival of worms on PA14 were smaller than those of *hsp-60::GFP Tg* #3. We currently do not know the basis of this variability among the transgenic lines.
- F Two independent lines of transgenic animals with extrachromosomal arrays of *hsp-60* (*hsp-60 Tg* #1 and #2) showed significant increases in PA14 resistance ( $P < 0.01$  and  $P < 0.001$ , respectively). The effects of *hsp-60 Tg* on PA14 resistance tend to be smaller than those of *hsp-60::GFP Tg* (Fig 6G). Note that the levels of *hsp-60* mRNA were significantly increased by 1.2- to 1.4-fold in *hsp-60 Tg* animals and by 2.3-fold in *hsp-60::GFP Tg* animals (A and B). Thus, it seems likely that the levels of *hsp-60* mRNA correlate with the survival time of animals on PA14.
- G A line of transgenic animals with an extrachromosomal array of *hsp-60::GFP* (#3) lived slightly shorter than control animals on *Escherichia coli* (OP50).

Data information: Error bars represent SEM.  $P$ -values were calculated by using two-tailed Student's  $t$ -test ( $*P < 0.05$ ,  $**P < 0.01$ ) (A, B, and D), or by using log-rank test (E–G). See Appendix Tables S7 and S8 for additional repeats and statistical analysis for the survival and the lifespan data shown in this figure.

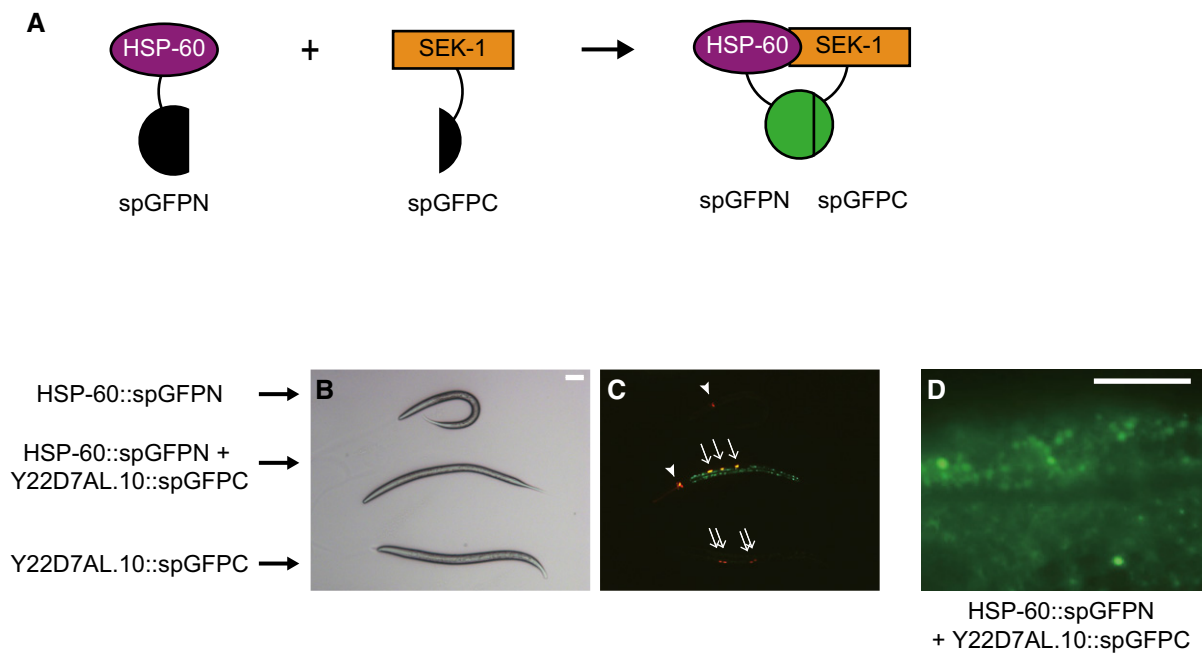

**Figure EV4. HSP-60 and Y22D7AL.10/HSPE1 physically interact with each other.**

**A** A schematic showing *in vivo* protein interaction using split GFP (spGFP) systems shown in Fig 9G–I. Physical interaction between HSP-60 and SEK-1 leads to the emission of green fluorescence.

**B–D** Bright field (**B**) and fluorescence (**C**) images of the animals that expressed an N-terminal GFP fragment fused with HSP-60 (HSP-60::spGFPN) and/or a C-terminal GFP fragment fused with Y22D7AL.10 (Y22D7AL.10::spGFPC) driven by an intestine-specific *uha-6* promoter. Among siblings from the same hermaphrodite, transgenic animals that expressed both HSP-60::spGFPN and Y22D7AL.10::spGFPC displayed GFP signals (**C**) ( $n = 5$ ). The GFP signals were concentrated in punctae (**D**), which appear to be mitochondria. Arrowheads indicate *odr-1p::RFP*, a co-injection marker for HSP-60::spGFPN. Arrows indicate *coel::RFP*, a co-injection marker for Y22D7AL.10::spGFPC. Scale bars indicate 50  $\mu$ m.

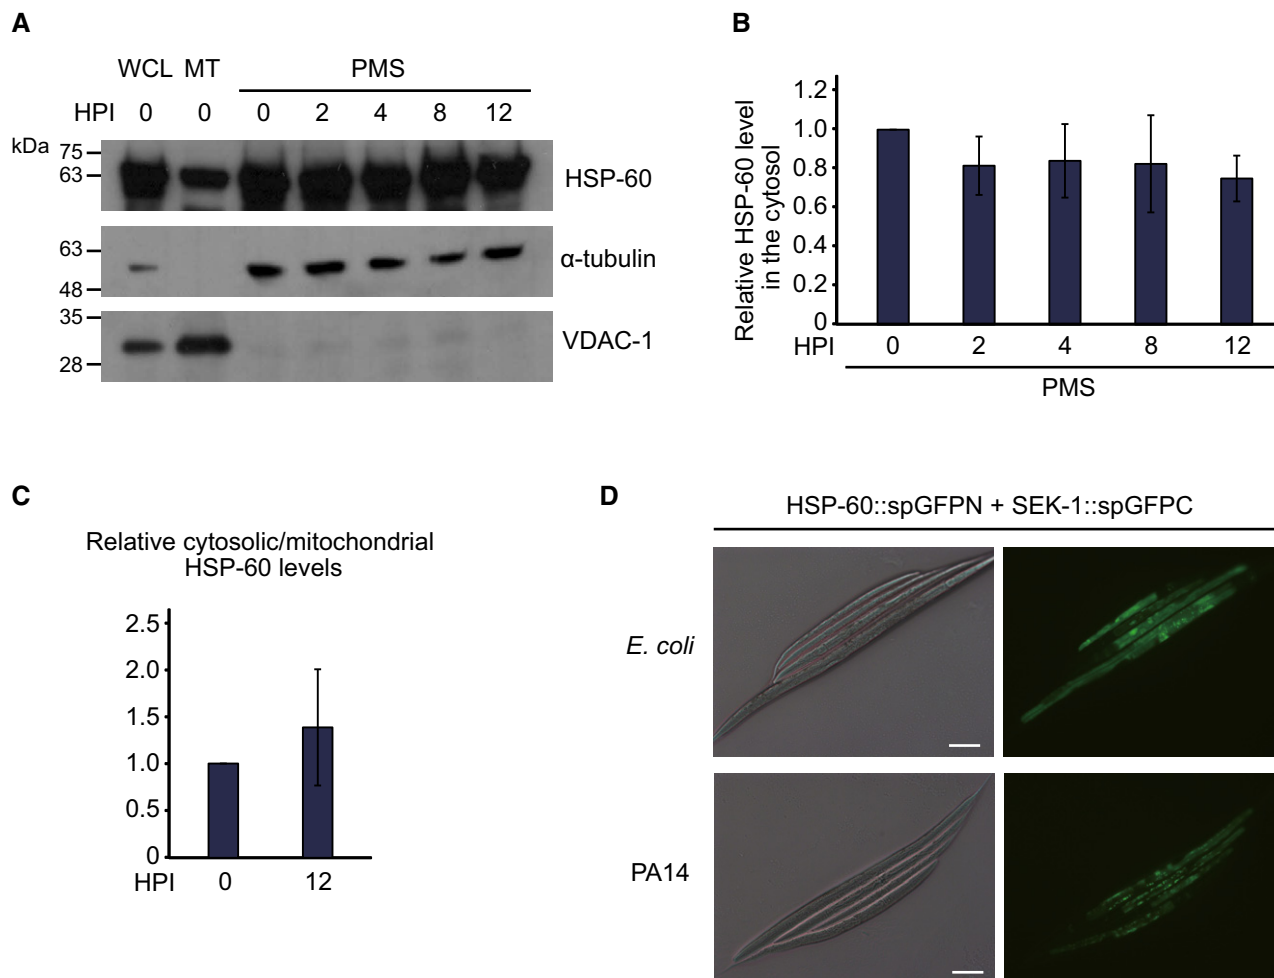

**Figure EV5. PA14 infection does not alter the subcellular distribution of HSP-60.**

A, B Time-course data of the PA14 infection followed by subcellular fractionation and Western blot analyses indicate that the level of HSP-60 in post-mitochondrial supernatant (PMS) was not significantly changed by PA14 infection ( $n = 4$ ). The levels of HSP-60/ $\alpha$ -tubulin in the PMS were quantified at different time points of PA14 infection as indicated. WCL and MT indicate whole-cell lysate and mitochondria, respectively.  $\alpha$ -tubulin and VDAC-1 were used as markers for the PMS and mitochondria, respectively. HPI: hours postPA14 infection.

C Relative cytosolic/mitochondrial HSP-60 levels were quantified from the Western blot data in Fig 9A ( $n = 3$ ). The ratio of cytosolic and mitochondrial HSP-60 was not significantly changed by PA14 infection (12 h).

D Bright field (left) and fluorescence (right) images of double transgenic animals that expressed both HSP-60::spGFPN and SEK-1::spGFPC in the intestine. PA14 infection for 12 h did not increase the fluorescent signals. Scale bars indicate 50  $\mu$ m.

Data information: Error bars represent SEM. Two-tailed Student's  $t$ -test was used for calculating  $P$ -values.
